# Supplementary material
Source: PubMed Central journal article supplement (PMC8857262)
Supplement: 41396_2021_1110_MOESM1_ESM.pdf [file 41396_2021_1110_MOESM1_ESM.pdf]

## SUPPLEMENTARY INFORMATION:

### Microbial storage and its implications for soil ecology

Mason-Jones, K., Robinson, S.L., Veen, G.F., Manzoni, S., van der Putten, W.H.

## Supplementary Information 1: Overview of microbial storage compounds

### 1 Triacylglycerides

Triacylglycerides (TAG) are ubiquitous across eukaryotes and bacteria. Genomic analysis has not found TAG biosynthetic ability in archaea [1], corroborating the absence of observed TAG accumulation [2]. Microbial TAG has received particular research interest due to potential industrial applications, especially for biofuel production [3]. Many bacteria and fungi can amass TAG stores accounting for substantial proportions of their total biomass, sometimes exceeding 60% of cell dry weight (CDW) [3, 4]. TAG in soil has attracted attention due to the value of the constituent fatty acids as taxonomic and trophic markers (neutral lipid fatty acids – NLFA [5]), but their storage role has been largely overlooked in soil ecosystems.

#### 1.1 Chemistry

TAGs consist of three fatty acids linked, through ester bonds, to a common glycerol molecule. While the triacylglyceride construct is shared by all producing organisms (including mammalian fat), the chain length, branching, and saturation of the constituent fatty acids varies, hence their value as biomarkers [5]. Triacylglycerides are hydrophobic lipids with highly reduced carbon. As a result they represent osmotically neutral storage with very high energy density [6].

#### 1.2 Biosynthesis and degradation

Biosynthesis of triacylglycerides begins by linking two fatty acids (in the form of fatty acyl-CoA) to a glycerol backbone to form a diacylglyceride, by pathways shared with phospholipid biosynthesis [7]. The key enzyme for TAG synthesis is the acyl-coenzyme A:diacylglycerol acyltransferase that catalyses the transfer of a third fatty acid moiety to the remaining hydroxyl group on the glycerol backbone [8]. In prokaryotes this function is fulfilled by a distinct and promiscuous wax ester synthase/acyl-CoA:DAG acyltransferase enzyme that can accept either diacylglycerol to produce TAG or fatty alcohol to yield wax esters [7, 9]. *De novo* synthesis of the fatty acid is not a prerequisite: incorporation of exogenous or recycled fatty acids into triacylglycerides, with or without modification, has been demonstrated [3, 7].

Triacylglycerides are degraded by lipases to release the fatty acids by hydrolysis. The fatty acids are then catabolized to acetyl-CoA via the beta-oxidation pathway with concomitant generation of reducing equivalents (NADH, FADH<sub>2</sub>), which in aerobic organisms can drive ATP synthesis by oxidative phosphorylation. TAGs therefore have the potential disadvantage that they can only yield energy under aerobic conditions [6]. The majority of characterized microbial lipases to date are from *Bacillus* spp., but lipases from many other bacteria have been purified including *Burkholderia*, *Acinetobacter*, and *Enterococcus* [10].

### 2 Polyhydroxyalkanoates

Polyhydroxyalkanoates (PHA) are a family of bacterial and archaeal storage lipids that have been intensively researched as biodegradable, renewable alternatives to petrochemical plastic [11], and for their importance in wastewater treatment processes [12]. PHA storage is not known among eukaryotes [13]. Intracellular storage of PHA occurs in observable lipid inclusion bodies which can constitute large proportions of biomass, even exceeding 80% of CDW under optimized conditions [11, 14].

#### 2.1 Chemistry

PHAs are straight-chain polyesters, often consisting mainly or exclusively of 3-hydroxybutyrate monomers. However, diverse copolymers are known with different carbon chains or hydroxyl group positions in the

monomer, for example 3-hydroxyvalerate, 4-hydroxybutyrate and 3-hydroxydecanoate [11]. Typically, the polyester chain will comprise hundreds to thousands of monomeric units [15]. Ester bonds are apolar and so, though less reduced than triacylglycerides, PHAs are nevertheless highly hydrophobic [16].

## 2.2 Biosynthesis and degradation

De novo synthesis of polyhydroxybutyrate begins with the condensation of two acetyl-CoA molecules to form acetoacetyl-CoA, which is then reduced by acetoacetyl-CoA reductase to yield 3-hydroxybutyryl-CoA for polymerization. However, biosynthesis of different hydroxyacyl-CoA monomers can proceed by various anabolic or catabolic pathways [17], including via metabolic links with fatty acid pathways [18]. In the final step of PHA biosynthesis, PHA synthase accepts a hydroxyacyl-CoA precursor and uses this to form a new ester bond, extending the polymer chain from the hydroxyl end.

PHA is degraded through hydrolysis by PHA depolymerase, to release soluble hydroxyacid monomers. In addition to intracellular catabolism by PHA producers, many bacteria that do not themselves accumulate PHA nevertheless secrete extracellular PHA depolymerases to scavenge from necromass in their vicinity [19].

## 3 Glycogen

Glycogen storage occurs in animals, fungi and bacteria [20]. Genomic analysis indicates that the biosynthetic pathways are also present in archaea [1]. Glycogen storage does not occur in plants, although starch is very similar in structure. Inclusions in bacteria and fungi are frequently observed microscopically, while chemical analyses have reported accumulations of up to 9% of CDW [21].

### 3.1 Chemistry

Glycogen is a polymer of  $\alpha 1 \rightarrow 4$  linked glucose, with  $\alpha 1 \rightarrow 6$  branches, reaching total molecular masses of  $10^7$ – $10^8$  Da [20]. As a polysaccharide, it is hydrophilic and relatively highly oxidized, implying lower energy density than the more reduced lipids just described. The high degree of polymerization enables storage of glucose without greatly increasing osmotic pressure [20, 22].

### 3.2 Biosynthesis and degradation

Glycogen is synthesized from ADP-glucose (in bacteria) or UDP-glucose (in eukaryotes) by glycogen synthase, which catalyzes the formation of a new  $\alpha 1 \rightarrow 4$  bond on the non-reducing end of an existing chain [23, 24]. Branching enzyme subsequently relocates the tail of the growing  $1 \rightarrow 4$  chain to the C6 position of an internal glucose residue, forming a new  $\alpha 1 \rightarrow 6$  branch-point. Glycogen is catabolized by the combined action of debranching enzyme and glycogen phosphorylases, to release glucose-1-phosphate [23, 25].

## 4 Trehalose

Trehalose biosynthesis is widespread, occurring in bacteria, archaea, fungi, plants and invertebrates. Storage of C and energy was originally believed to be its principle purpose, but numerous other roles have since been ascribed to the compound, most importantly in osmotic regulation and protection against other stresses. Unlike other storage compounds discussed here, there are relatively few reports of trehalose accumulation to large proportions of biomass, possibly due to the high osmotic pressures that would be generated. However, *Saccharomyces cerevisiae* has been reported to accumulate up to 16% of CDW as trehalose under some conditions [26].

### 4.1 Chemistry

Trehalose is a soluble, non-reducing sugar consisting of two glucose molecules linked through an  $\alpha, \alpha$ -1,1-glycosidic bond [27]. It is hydrophilic, has low molecular mass (342 Da) and is osmotically active.

### 4.2 Biosynthesis and degradation

The major pathway for trehalose synthesis converts UDP-glucose and glucose-6-phosphate to trehalose-6-phosphate and UDP, catalysed by trehalose-6-phosphate synthase [27, 28]. This is subsequently

dephosphorylated to trehalose by trehalose-6-phosphate phosphatase. Alternative biosynthetic pathways have also been described that convert other glucose polymers, such as maltose or glycogen, to trehalose [28]. In total, five different enzymatic pathways for trehalose synthesis have been described and have been recently reviewed [29]. Trehalose catabolism proceeds by hydrolysis to release the constituent glucose molecules, catalyzed by trehalases [27].

## 5 Wax esters

Wax esters are lipids present as intracellular inclusion bodies in various prokaryotes [7]. They are also widespread among eukaryotes, for example in the hydrophobic cuticles on external plant surfaces [30], but eukaryotic storage functions are uncommon [31–33].

### 5.1 Chemistry

A wax ester is the condensation product of a fatty acid and a fatty alcohol, each typically 16 or 18 carbon atoms in length but, as for TAGs, with considerable variation in length, saturation and structure of the carbon chain. They share with TAGs the properties of high energy density, hydrophobicity and osmotic neutrality [7].

### 5.2 Biosynthesis and degradation

Wax ester synthesis by bacteria is catalysed by wax ester synthase/acyl-CoA:DAG acyltransferase, the enzyme also responsible for the final step of bacterial TAG synthesis [34]. In this case a new ester bond is formed from a fatty acyl-CoA and a fatty alcohol, the latter derived from the two-step reduction of another fatty acyl-CoA [7].

Like TAGs, the highly reduced carbon of wax esters can only yield energy through aerobic catabolism. Broad specificity cutinases hydrolyse a variety of wax esters including cutin, which is a major component of plant leaf cuticles. Cutinases have been primarily characterized in plant pathogenic fungi due to their role in pathogenicity [35], but they are also found in some bacteria [36].

## 6 Polyphosphate

Polyphosphate is ubiquitous in all branches of life. It is a truly ancient biomolecule, possibly pre-dating life itself, and plays multiple physiological roles [37, 38]. These include phosphorus and energy storage, but also cellular pH buffering, heavy metal chelation, and involvement in cellular regulation, amongst others [37]. Kornberg et al. argue, however, that the rapid turnover of ATP in *Escherichia coli* implies that even large polyphosphate stores could not support the cellular energy budget for substantial periods of time, and they therefore question its significance for energy storage [39]. Its role in phosphorus storage is more clear-cut [37].

### 6.1 Chemistry

Polyphosphate is a polymer of inorganic phosphate, consisting of chains of tens to hundreds of phosphate monomers linked by phosphoanhydride bonds, the same phosphate-phosphate binding chemistry as the cellular energy carrier ATP [38]. Hydrolysis of these 'high-energy' bonds involves a similar free energy change to ATP hydrolysis, and the polymer can act as a direct ATP substitute in some biochemical reactions or be used for ATP synthesis [37]. When aggregated into storage structures with multivalent cations such as calcium, it has little effect on cellular osmotic pressure [37–39].

### 6.2 Biosynthesis and degradation

The primary enzymes involved in the biosynthesis of polyphosphates in bacteria are polyphosphate kinases, PPK1 and PPK2. PPK1 reversibly and selectively transfers the gamma-phosphate from ATP to polyphosphate [40], whereas PPK2 can act on either ATP or GTP [41]. In lower eukaryotes including amoebae, the biosynthetic genes were postulated to have been acquired via horizontal gene transfer from prokaryotes [42]. Enzymes responsible for the synthesis of inorganic polyphosphate have not yet been characterized in higher eukaryotes such as mammals [42].

PPK2 is also capable of hydrolysing polyphosphate to convert GDP into GTP [41]. PPK2 is thus bifunctional and involved in both biosynthesis and degradation. Other enzymes involved in polyphosphate hydrolysis include endo- and exopolyphosphatases. As their names suggest, the endopolyphosphatases cleave internal phosphoanhydride bonds whereas exopolyphosphatases work backwards from the terminal phosphate residue [43, 44]. In addition to releasing stored phosphorus and energy, these degradative enzymes are also postulated to regulate levels of polyphosphates in the cytosol since high levels of cytosolic polyphosphate are toxic, at least in yeast [45]. For more detailed coverage of polyphosphate biochemistry, we refer readers to comprehensive reviews [37, 38].

## 7 Cyanophycin

Cyanophycin, sometimes termed CGP (cyanophycin granule peptide), is a nitrogen storage polypeptide with a C:N ratio of 1.7. It occurs in most cyanobacteria and some heterotrophic bacteria [46, 47]. Cyanobacteria are known to accumulate cyanophycin up to 18% of CDM [47], while over 40% of CDM has been reported for *Acinetobacter calcoaceticus* [48]. Genomic analysis suggests a potentially much wider distribution among bacteria, but not in archaea or eukaryotes [46].

### 7.1 Chemistry

Cyanophycin consists of L-arginyl-poly(L-aspartate), i.e., a polypeptide backbone of aspartic acid, with additional amide bonding through the side-chains to the  $\alpha$ -amino group of arginine. The polymer reaches molecular masses of 25-100 kDa [49]. Arginine is present on virtually all aspartate side-chains, so that the molar ratio of the amino acid residues is approximately one [50].

### 7.2 Biosynthesis and degradation

Biosynthesis from arginine and aspartate is catalysed by cyanophycin synthetase, without the involvement of mRNA templates or ribosomes [50]. Degradation proceeds by hydrolysis from the C-terminus, catalysed by cyanophycinase, which releases aspartate-arginine dimers for subsequent degradation [46].

## Supplementary 1 References

1. Wang L, Liu Q, Wu X, Huang Y, Wise MJ, Liu Z, et al. Bioinformatics analysis of metabolism pathways of archaeal energy reserves. *Sci Rep* 2019; **9**: 1034.
2. Murphy DJ. The dynamic roles of intracellular lipid droplets: From archaea to mammals. *Protoplasma* 2012; **249**: 541–585.
3. Athenaki M, Gardeli C, Diamantopoulou P, Tchakouteu SS, Sarris D, Philippoussis A, et al. Lipids from yeasts and fungi: physiology, production and analytical considerations. *J Appl Microbiol* 2018; **124**: 336–367.
4. Wältermann M, Luftmann H, Baumeister D, Kalscheuer R, Steinbüchel A. *Rhodococcus opacus* strain PD630 as a new source of high-value single-cell oil? Isolation and characterization of triacylglycerols and other storage lipids. *Microbiology* 2000; **146**: 1143–1149.

5. Ruess L, Chamberlain PM. The fat that matters: Soil food web analysis using fatty acids and their carbon stable isotope signature. *Soil Biol Biochem* 2010; **42**: 1898–1910.
6. Alvarez H, Steinbüchel A. Triacylglycerols in prokaryotic microorganisms. *Appl Microbiol Biotechnol* 2002; **60**: 367–376.
7. Wältermann M, Steinbüchel A. Wax ester and triacylglycerol inclusions. In: Shively JM (ed). *Inclusions in Prokaryotes*. 2006. Springer-Verlag, Berlin/Heidelberg, pp 137–166.
8. Kalscheuer R. Genetics of wax ester and triacylglycerol biosynthesis in bacteria. In: Timmis KN (ed). *Handbook of Hydrocarbon and Lipid Microbiology*. 2010. Springer, Berlin, Heidelberg, pp 527–535.
9. Stöveken T, Kalscheuer R, Malkus U, Reichelt R, Steinbüchel A. The Wax Ester Synthase/Acyl Coenzyme A:Diacylglycerol Acyltransferase from *Acinetobacter* sp. Strain ADP1: Characterization of a Novel Type of Acyltransferase. *J Bacteriol* 2005; **187**: 1369–1376.
10. Javed S, Azeem F, Hussain S, Rasul I, Siddique MH, Riaz M, et al. Bacterial lipases: A review on purification and characterization. *Prog Biophys Mol Biol* 2018; **132**: 23–34.
11. Koller M, Maršálek L, de Sousa Dias MM, Braunegg G. Producing microbial polyhydroxyalkanoate (PHA) biopolyesters in a sustainable manner. *N Biotechnol* 2017; **37**: 24–38.
12. Mannina G, Presti D, Montiel-Jarillo G, Carrera J, Suárez-Ojeda ME. Recovery of polyhydroxyalkanoates (PHAs) from wastewater: A review. *Bioresource Technology* 2020; **297**: 122478.
13. Jendrossek D, Pfeiffer D. New insights in the formation of polyhydroxyalkanoate granules (carbonosomes) and novel functions of poly(3-hydroxybutyrate): A simple molecule with multiple functions. *Environ Microbiol* 2014; **16**: 2357–2373.
14. Kourmentza C, Plácido J, Venetsaneas N, Burniol-Figols A, Varrone C, Gavala HN, et al. Recent advances and challenges towards sustainable polyhydroxyalkanoate (PHA) production. *Bioengineering* 2017; **4**: 55.
15. Li Z, Yang J, Loh XJ. Polyhydroxyalkanoates: opening doors for a sustainable future. *NPG Asia Mater* 2016; **8**: e265–e265.
16. Hauschild P, Röttig A, Madkour MH, Al-Ansari AM, Almakishah NH, Steinbüchel A. Lipid accumulation in prokaryotic microorganisms from arid habitats. *Appl Microbiol Biotechnol* 2017; **101**: 2203–2216.

17. Philip S, Keshavarz T, Roy I. Polyhydroxyalkanoates: biodegradable polymers with a range of applications. *J Chem Technol Biotechnol* 2007; **82**: 233–247.
18. Rehm BHA, Krüger N, Steinbüchel A. A New metabolic link between fatty acid *de novo* synthesis and polyhydroxyalkanoic acid synthesis. *J Biol Chem* 1998; **273**: 24044–24051.
19. Kadouri D, Jurkevitch E, Okon Y, Castro-Sowinski S. Ecological and agricultural significance of bacterial polyhydroxyalkanoates. *Crit Rev Microbiol* 2005; **31**: 55–67.
20. Wilson WA, Roach PJ, Montero M, Baroja-Fernández E, Muñoz FJ, Eydallin G, et al. Regulation of glycogen metabolism in yeast and bacteria. *FEMS Microbiol Rev* 2010; **34**: 952–985.
21. Seibold G, Dempf S, Schreiner J, Eikmanns BJ. Glycogen formation in *Corynebacterium glutamicum* and role of ADP-glucose pyrophosphorylase. *Microbiology* 2007; **153**: 1275–1285.
22. Roach PJ, Depaoli-Roach AA, Hurley TD, Tagliabracci VS. Glycogen and its metabolism: some new developments and old themes. *Biochem J* 2012; **441**: 763–787.
23. Ball S, Colleoni C, Cenci U, Raj JN, Tirtiaux C. The evolution of glycogen and starch metabolism in eukaryotes gives molecular clues to understand the establishment of plastid endosymbiosis. *J Exp Bot* 2011; **62**: 1775–1801.
24. Preiss J. Glycogen: Biosynthesis and regulation. *EcoSal Plus* 2014; **6**.
25. Goh YJ, Klaenhammer TR. Insights into glycogen metabolism in *Lactobacillus acidophilus*: impact on carbohydrate metabolism, stress tolerance and gut retention. *Microb Cell Fact* 2014; **13**: 94.
26. Lillie SH, Pringle JR. Reserve carbohydrate metabolism in *Saccharomyces cerevisiae*: responses to nutrient limitation. *J Bacteriol* 1980; **143**: 1384–1394.
27. Elbein AD. New insights on trehalose: a multifunctional molecule. *Glycobiology* 2003; **13**: 17R-27R.
28. Ruhel R, Kataria R, Choudhury B. Trends in bacterial trehalose metabolism and significant nodes of metabolic pathway in the direction of trehalose accumulation: Trehalose metabolism in bacteria. *Microb Biotechnol* 2013; **6**: 493–502.
29. Sakaguchi M. Diverse and common features of trehalases and their contributions to microbial trehalose metabolism. *Appl Microbiol Biotechnol* 2020; **104**: 1837–1847.

30. Post-Beittenmiller D. Biochemistry and molecular biology of wax production in plants. *Annu Rev Plant Physiol Plant Mol Biol* 1996; **47**: 405–430.
31. Nevenzel JC. Occurrence, function and biosynthesis of wax esters in marine organisms. *Lipids* 1970; **5**: 308–319.
32. Yermanos DM. Composition of jojoba seed during development. *J Am Oil Chem Soc* 1975; **52**: 115–117.
33. Inui H, Miyatake K, Nakano Y, Kitaoka S. Wax ester fermentation in *Euglena gracilis*. *FEBS Letters* 1982; **150**: 89–93.
34. Alvarez HM. Triacylglycerol and wax ester-accumulating machinery in prokaryotes. *Biochimie* 2016; **120**: 28–39.
35. Li D, Ashby AM, Johnstone K. Molecular evidence that the extracellular cutinase Pbc1 is required for pathogenicity of *Pyrenopeziza brassicae* on oilseed rape. *Mol Plant Microbe Interact* 2003; **16**: 545–552.
36. Chen S, Tong X, Woodard RW, Du G, Wu J, Chen J. Identification and characterization of bacterial cutinase. *J Biol Chem* 2008; **283**: 25854–25862.
37. Albi T, Serrano A. Inorganic polyphosphate in the microbial world. Emerging roles for a multifaceted biopolymer. *World J Microbiol Biotechnol* 2016; **32**: 27.
38. Rao NN, Gómez-García MR, Kornberg A. Inorganic polyphosphate: Essential for growth and survival. *Annu Rev Biochem* 2009; **78**: 605–647.
39. Kornberg A, Rao NN, Ault-Riché D. Inorganic polyphosphate: A molecule of many functions. *Annu Rev Biochem* 1999; **68**: 89–125.
40. Ahn K, Kornberg A. Polyphosphate kinase from *Escherichia coli*. Purification and demonstration of a phosphoenzyme intermediate. *J Biol Chem* 1990; **265**: 11734–11739.
41. Ishige K, Zhang H, Kornberg A. Polyphosphate kinase (PPK2), a potent, polyphosphate-driven generator of GTP. *Proc Natl Acad Sci USA* 2002; **99**: 16684–16688.
42. Desfougères Y, Saiardi A, Azevedo C. Inorganic polyphosphate in mammals: where's Wally? *Biochem Soc Trans* 2020; **48**: 95–101.
43. Kumble KD, Kornberg A. Endopolyphosphatases for long chain inorganic polyphosphate in yeast and mammals. *J Biol Chem* 1996; **271**: 27146–27151.

44. Lonetti A, Szigyarto Z, Bosch D, Loss O, Azevedo C, Saiardi A. Identification of an evolutionarily conserved family of inorganic polyphosphate endopolyphosphatases. *J Biol Chem* 2011; **286**: 31966–31974.
45. Gerasimaite R, Sharma S, Desfougeres Y, Schmidt A, Mayer A. Coupled synthesis and translocation restrains polyphosphate to acidocalcisome-like vacuoles and prevents its toxicity. *J Cell Sci* 2014; **127**: 5093–5104.
46. Fuser G, Steinbüchel A. Analysis of genome sequences for genes of cyanophycin metabolism: Identifying putative cyanophycin metabolizing prokaryotes. *Macromol Biosci* 2007; **7**: 278–296.
47. Watzter B, Forchhammer K. Cyanophycin: A nitrogen-rich reserve polymer. In: Tiwari A (ed). *Cyanobacteria*. 2018. InTech.
48. Elbahloul Y, Krehenbrink M, Reichelt R, Steinbuchel A. Physiological conditions conducive to high cyanophycin content in biomass of *Acinetobacter calcoaceticus* strain ADP1. *Appl Environ Microbiol* 2005; **71**: 858–866.
49. Kimber MS. Cyanophycinase. In: Rawlings N, Salveson G (eds). *Handbook of Proteolytic Enzymes*. 2013. Academic Press, pp 3625–3628.
50. Stubbe J, Tian J, He A, Sinskey AJ, Lawrence AG, Liu P. Non-template-dependent polymerization processes: Polyhydroxyalkanoate synthases as a paradigm. *Annu Rev Biochem* 2005; **74**: 433–480.



## Supplementary Information 2A: Figure 1 with genera

Figure 1 in the text was generated from a comprehensive literature survey of taxa shown to accumulate storage compounds. We identified taxa with evidence for storage compound accumulation at the genus level as follows: (i) storage traits have been phenotypically demonstrated for at least one member of the genus as either (a) the build-up of at least 5% of cell dry weight as a known storage compound, or (b) build-up of storage compounds to a sufficient degree for observation by light microscopy; and (ii) the genus has at least one member that occurs in soil. Literature describing storage traits was assembled by searching Web of Science using combinations of keywords “polyhydroxybutyr\*”; “polyhydroxyalkano\*”; “triacylglyceride”; “glycogen”; “polyphosphate”; “trehalose”; “cyanophycin”; “wax ester”; “PHA”; “PHB”; “NLFA”; “microb\*”; “bact\*”; “fung\*”; “stor\*”; “accumul\*”; “reserve”, supplemented by literature citing or cited by relevant studies from this search. These studies were surveyed to obtain a shortlist of 89 bacterial and 40 fungal genera that fulfilled criterion (i), based on 126 peer-reviewed journal articles. For each of these genera, a second Web of Science search was then performed using the genus and “soil” to find evidence for its occurrence in soil. References are provided in Supplementary 2B.

To visualize the identified genera in the context of the overall microbial tree of life, we included a selection of representative bacterial and fungal taxa established in phylogenetic studies by Choi et al. [1] and Jun et al. [2]. A cladogram constructed using the NCBI taxonomy database [3] was used to display the relative relationships of the identified genera alongside the storage compounds known to be associated with each taxon at the genus level (Figure S2.1). A total of 488 representative bacterial and fungal genera corresponding to 26 phyla are shown, with 106 genera (10 phyla) that satisfy both criteria (i) and (ii).

1. Choi J, Kim S-H. A genome tree of life for the fungi kingdom. *Proc Natl Acad Sci USA* 2017; **114**: 9391–9396.
2. Jun S-R, Sims GE, Wu GA, Kim S-H. Whole-proteome phylogeny of prokaryotes by feature frequency profiles: An alignment-free method with optimal feature resolution. *Proc Natl Acad Sci USA* 2010; **107**: 133–138.
3. Schoch CL, Ciufo S, Domrachev M, Hottton CL, Kannan S, Khovanskaya R, et al. NCBI Taxonomy: a comprehensive update on curation, resources and tools. *Database* 2020; **2020**: baaa062.

### Figure S2.1

(zoom in to view genus names)

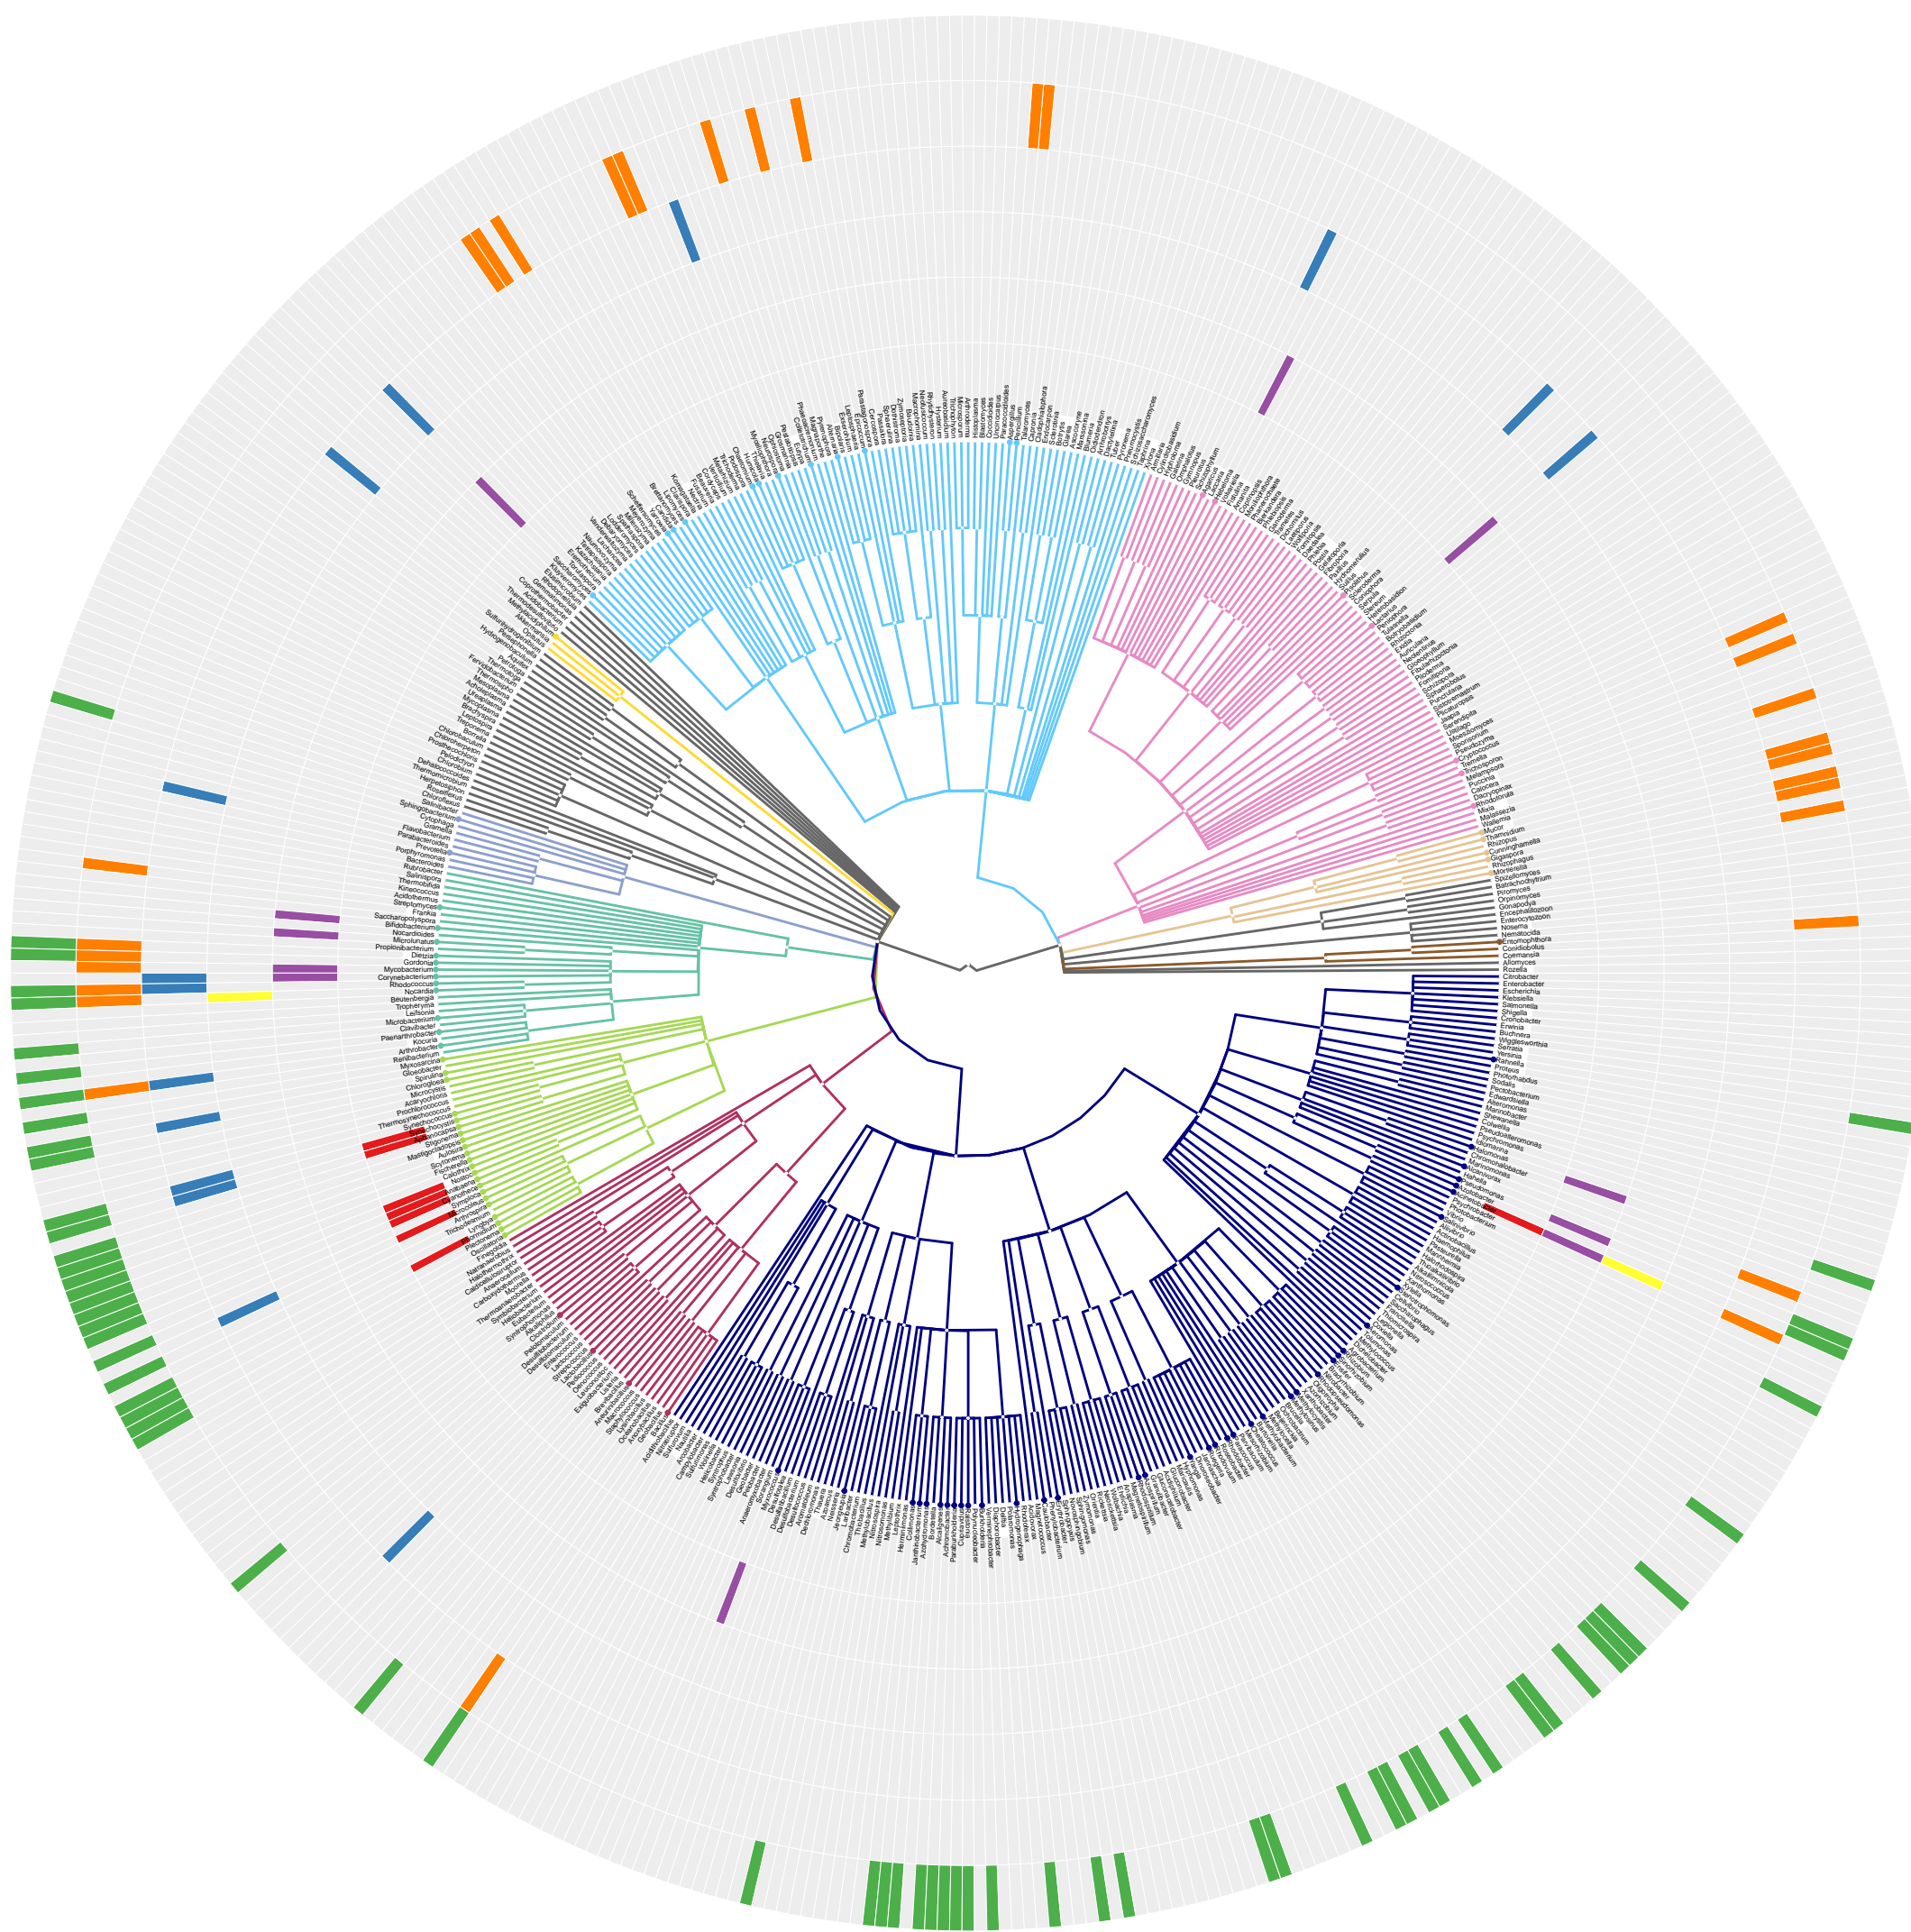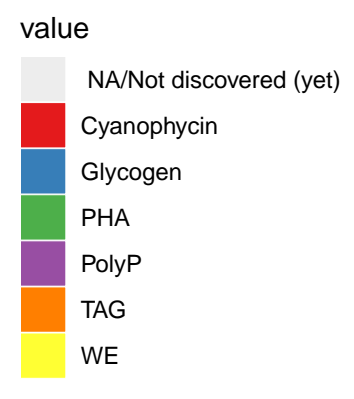

## Supplementary Information 2B: Sources for Figure 1

**Table S2.1: Literature sources for Figure 1 - Fungi**

| <b>Genus</b>   | <b>Storage</b> | <b>Soil occurrence</b> |
|----------------|----------------|------------------------|
| Agaricus       | [1]            | [2]                    |
| Alternaria     | [3]            | [4]                    |
| Aspergillus    | [5]            | [6]                    |
| Candida        | [7]            | [8]                    |
| Chaetomium     | [9]            | [10]                   |
| Colletotrichum | [3]            | [11]                   |
| Cryptococcus   | [9]            | [12]                   |
| Cunninghamella | [13, 14]       | [15]                   |
| Entomophthora  | [16]           | [17]                   |
| Epicoccum      | [9]            | [18]                   |
| Gigaspora      | [19]           | [20]                   |
| Hebeloma       | [21]           | [21]                   |
| Humicola       | [9]            | [22]                   |
| Lactarius      | [23]           | [23]                   |
| Lipomyces      | [24]           | [25]                   |
| Mortierella    | [14]           | [26]                   |
| Mucor          | [27]           | [28]                   |
| Neurospora     | [29]           | [30]                   |
| Penicillium    | [31]           | [32]                   |
| Pisolithus     | [33]           | [34]                   |
| Pythium        | [16]           | [35]                   |
| Rhodosporidium | [36]           | [37]                   |
| Rhodotorula    | [9]            | [38]                   |
| Saccharomyces  | [39, 40]       | [41]                   |
| Thamnidium     | [9]            | [42]                   |
| Trichosporon   | [9]            | [43]                   |
| Yarrowia       | [44]           | [45]                   |

**Table S2.2: Literature sources for Figure 1 - Bacteria**

| <b>Genus</b>     | <b>Storage</b> | <b>Soil occurrence</b> |
|------------------|----------------|------------------------|
| Achromobacter    | [46]           | [47]                   |
| Acinetobacter    | [48–52]        | [53]                   |
| Aeromonas        | [54]           | [55]                   |
| Alcaligenes      | [56]           | [57]                   |
| Alcanivorax      | [58]           | [59, 60]               |
| Anabaena         | [61, 62]       | [63]                   |
| Aneurinibacillus | [64]           | [65]                   |
| Aphanocapsa      | [66]           | [63]                   |
| Arthrobacter     | [9, 67–69]     | [70]                   |
| Arthrospira      | [71, 72]       | [63]                   |
| Aulosira         | [73]           | [74]                   |
| Azohydromonas    | [75]           | [76]                   |
| Azospirillum     | [77]           | [78]                   |
| Azotobacter      | [79]           | [80]                   |

|                   |                |                |
|-------------------|----------------|----------------|
| Bacillus          | [81, 82]       | [82]           |
| Bifidobacterium   | [83]           | [84]           |
| Burkholderia      | [85]           | [86]           |
| Calothrix         | [62]           | [87]           |
| Caulobacter       | [88]           | [89]           |
| Chelatococcus     | [90]           | [91]           |
| Chlorogloea       | [62]           | [92]           |
| Clostridium       | [93]           | [94]           |
| Collimonas        | [68]           | [95]           |
| Corynebacterium   | [96, 97]       | [98]           |
| Cupriavidus       | [99]           | [82, 100]      |
| Cyanothece        | [101]          | [102]          |
| Dietzia           | [103]          | [104]          |
| Ensifer           | [68]           | [68]           |
| Erythrobacter     | [105]          | [106]          |
| Fischerella       | [62]           | [107]          |
| Gordonia          | [103, 108]     | [109]          |
| Halomonas         | [110, 111]     | [112]          |
| Hydrogenophaga    | [113]          | [114]          |
| Janthinobacterium | [115]          | [68]           |
| Jeongeupia        | [116]          | [116]          |
| Lactobacillus     | [117]          | [118]          |
| Lyngbya           | [62]           | [119]          |
| Mastigocladopsis  | [62]           | [120]          |
| Methylacidiphilum | [121]          | [122]          |
| Methylobacterium  | [123]          | [123]          |
| Methylocystis     | [124]          | [125]          |
| Methylosinus      | [124]          | [126]          |
| Microbacterium    | [68]           | [68]           |
| Microcoleus       | [127, 128]     | [63, 129, 130] |
| Microlunatus      | [131]          | [132]          |
| Mycobacterium     | [133, 134]     | [135]          |
| Myxococcus        | [136]          | [137]          |
| Myxosarcina       | [62]           | [119]          |
| Nocardia          | [48, 103, 138] | [139]          |
| Nostoc            | [61, 140]      | [63]           |
| Oscillatoria      | [62]           | [63]           |
| Paenarthrobacter  | [68]           | [68]           |
| Paraburkholderia  | [141]          | [142]          |
| Paracoccus        | [143]          | [143]          |
| Phormidium        | [62, 128]      | [144]          |
| Plectonema        | [62]           | [119]          |
| Prevotella        | [145]          | [146]          |
| Pseudomonas       | [48, 147]      | [57]           |
| Rahnella          | [68]           | [148]          |
| Ralstonia         | [149]          | [150]          |
| Rhizobium         | [151]          | [152]          |
| Rhodobacter       | [153]          | [154]          |
| Rhodococcus       | [103, 155–157] | [82]           |
| Rhodopseudomonas  | [158]          | [154]          |

|                  |            |       |
|------------------|------------|-------|
| Rhodospirillum   | [159]      | [160] |
| Rhodovulum       | [161]      | [162] |
| Ruegeria         | [163]      | [164] |
| Salinivibrio     | [165]      | [166] |
| Scytonema        | [62]       | [167] |
| Sinorhizobium    | [151]      | [168] |
| Sphingobacterium | [169]      | [47]  |
| Spirulina        | [170, 171] | [63]  |
| Stenotrophomonas | [46]       | [46]  |
| Stigonema        | [62]       | [172] |
| Streptomyces     | [173]      | [174] |
| Symploca         | [62]       | [167] |
| Synechococcus    | [175, 176] | [177] |
| Synechocystis    | [178–180]  | [181] |
| Yangia           | [182]      | [182] |

1. Hammond JBW, Nichols R. Glycogen in *Agaricus bisporus*. *Trans Br Mycol Soc* 1976; **66**: 325–327.
2. Edwards PJ. Effects of the fairy ring fungus *Agaricus arvensis* on nutrient availability in grassland. *New Phytol* 1988; **110**: 377–381.
3. Dey P, Banerjee J, Maiti MK. Comparative lipid profiling of two endophytic fungal isolates – *Colletotrichum* sp. and *Alternaria* sp. having potential utilities as biodiesel feedstock. *Bioresour Technol* 2011; **102**: 5815–5823.
4. Lou J, Fu L, Peng Y, Zhou L. Metabolites from *Alternaria* fungi and their bioactivities. *Molecules* 2013; **18**: 5891–5935.
5. André A, Diamantopoulou P, Philippoussis A, Sarris D, Komaitis M, Papanikolaou S. Biotechnological conversions of bio-diesel derived waste glycerol into added-value compounds by higher fungi: production of biomass, single cell oil and oxalic acid. *Ind Crops Prod* 2010; **31**: 407–416.
6. Klich MA. Biogeography of *Aspergillus* species in soil and litter. *Mycologia* 2002; **94**: 21–27.

7. Nguyen LN, Nosanchuk JD. Lipid droplet formation protects against gluco/lipototoxicity in *Candida parapsilosis*: An essential role of fatty acid desaturase Ole1. *Cell Cycle* 2011; **10**: 3159–3167.
8. Ribeiro Bastos AE, Moon DH, Rossi A, Trevors JT, Tsai SM. Salt-tolerant phenol-degrading microorganisms isolated from Amazonian soil samples. *Arch Microbiol* 2000; **174**: 346–352.
9. Athenaki M, Gardeli C, Diamantopoulou P, Tchakouteu SS, Sarris D, Philippoussis A, et al. Lipids from yeasts and fungi: physiology, production and analytical considerations. *J Appl Microbiol* 2018; **124**: 336–367.
10. Tiedje JM, Hagedorn ML. Degradation of alachlor by a soil fungus, *Chaetomium globosum*. *J Agric Food Chem* 1975; **23**: 77–81.
11. Eastburn DM, Gubler WD. Strawberry Anthracnose: Detection and survival of *Colletotrichum acutatum* in soil. *Plant Dis* 1990; **74**: 161.
12. Thomas-Hall S, Watson K, Scorzetti G. *Cryptococcus statzelliae* sp. nov. and three novel strains of *Cryptococcus victoriae*, yeasts isolated from Antarctic soils. *Int J Syst Evol Microbiol* 2002; **52**: 2303–2308.
13. Fakas S, Galiotou-Panayotou M, Papanikolaou S, Komaitis M, Aggelis G. Compositional shifts in lipid fractions during lipid turnover in *Cunninghamella echinulata*. *Enzyme Microb Technol* 2007; **40**: 1321–1327.
14. Fakas S, Papanikolaou S, Batsos A, Galiotou-Panayotou M, Mallouchos A, Aggelis G. Evaluating renewable carbon sources as substrates for single cell oil production by *Cunninghamella echinulata* and *Mortierella isabellina*. *Biomass Bioenergy* 2009; **33**: 573–580.
15. Balraj J, Jairaman K, Kalieswaran V, Jayaraman A. Bioprospecting lovastatin production from a novel producer *Cunninghamella blakesleeana*. *3 Biotech* 2018; **8**: 359.
16. Ratledge C, Wynn JP. The biochemistry and molecular biology of lipid accumulation in oleaginous microorganisms. *Adv Appl Microbiol* 2002; **51**: 1–52.

17. Fromentin H, Hurion N, Mariat F. [Kinetics of production of collagenase, esterase and elastase by human and soil strains of 'Entomophthora coronata' (author's transl)]. *Ann Microbiol (Paris)* 1978; **129**: 425–431.
18. Arenz BE, Held BW, Jurgens JA, Farrell RL, Blanchette RA. Fungal diversity in soils and historic wood from the Ross Sea Region of Antarctica. *Soil Biol Biochem* 2006; **38**: 3057–3064.
19. Saito K, Kuga-Uetake Y, Saito M. Acidic vesicles in living hyphae of an arbuscular mycorrhizal fungus, *Gigaspora margarita*. *Plant Soil* 2004; **261**: 231–237.
20. Gemma JN, Koske RE. Seasonal variation in spore abundance and dormancy of *Gigaspora gigantea* and in mycorrhizal inoculum potential of a dune soil. *Mycologia* 1988; **80**: 211.
21. Frey B, Brunner I, Walther P, Scheidegger C, Zierold K. Element localization in ultrathin cryosections of high-pressure frozen ectomycorrhizal spruce roots. *Plant Cell Environ* 1997; **20**: 929–937.
22. White WL, Downing MH. *Humicola Grisea*, a soil-inhabiting, cellulolytic hyphomycete. *Mycologia* 1953; **45**: 951–963.
23. Genet P, Prevost A, Pargney JC. Seasonal variations of symbiotic ultrastructure and relationships of two natural ectomycorrhizae of beech (*Fagus sylvatica*/*Lactarius blennius* var. *viridis* and *Fagus sylvatica*/*Lactarius subdulcis*). *Trees* 2000; **14**: 465–474.
24. Sutanto S, Zullaikah S, Tran-Nguyen PL, Ismadji S, Ju Y-H. *Lipomyces starkeyi*: Its current status as a potential oil producer. *Fuel Process Technol* 2018; **177**: 39–55.
25. Thanh VN. *Lipomyces orientalis* sp. nov., a yeast species isolated from soil in Vietnam. *Int J Syst Evol Microbiol* 2006; **56**: 2009–2013.
26. Nagy LG, Petkovits T, Kovács GM, Voigt K, Vágvölgyi C, Papp T. Where is the unseen fungal diversity hidden? A study of *Mortierella* reveals a large contribution of reference collections to the identification of fungal environmental sequences. *New Phytol* 2011; **191**: 789–794.
27. Wynn JP, Hamid A bin A, Ratledge C. The role of malic enzyme in the regulation of lipid accumulation in filamentous fungi. *Microbiology* 1999; **145**: 1911–1917.

28. Donnison L, Griffiths GS, Hedger J, Hobbs PJ, Bardgett RD. Management influences on soil microbial communities and their function in botanically diverse haymeadows of northern England and Wales. *Soil Biol Biochem* 2000; **32**: 253–263.
29. Habel D, Plesofsky-Vig N, Bramblek R. The respiratory response to heat shock in *Neurospora crassa*. *FEMS Microbiol Lett* 1991; **81**: 317–322.
30. Allison SD, Romero-Olivares AL, Lu L, Taylor JW, Treseder KK. Temperature acclimation and adaptation of enzyme physiology in *Neurospora discreta*. *Fungal Ecol* 2018; **35**: 78–86.
31. Papanikolaou S, Dimou A, Fakas S, Diamantopoulou P, Philippoussis A, Galiotou-Panayotou M, et al. Biotechnological conversion of waste cooking olive oil into lipid-rich biomass using *Aspergillus* and *Penicillium* strains: Waste oil valorization by higher fungi. *J Appl Microbiol* 2011; **110**: 1138–1150.
32. Illmer P, Schinner F. Solubilization of inorganic phosphates by microorganisms isolated from forest soils. *Soil Biol Biochem* 1992; **24**: 389–395.
33. da Rocha Campos AN, Costa MD. Histochemistry and storage of organic compounds during basidiosporogenesis in the ectomycorrhizal fungus *Pisolithus microcarpus*. *World J Microbiol Biotechnol* 2010; **26**: 1745–1753.
34. Marx DH, Bryan WC, Cordell CE. Growth and ectomycorrhizal development of pine seedlings in nursery soils infested with the fungal symbiont *Pisolithus tinctorius*. *Forest Sci* 1976; **22**: 91–100.
35. Barton R. Saprophytic activity of *Pythium mamillatum* in soils. *Trans Brit Mycol Soc* 1960; **43**: 529–540.
36. Zhu Z, Zhang S, Liu H, Shen H, Lin X, Yang F, et al. A multi-omic map of the lipid-producing yeast *Rhodospiridium toruloides*. *Nat Commun* 2012; **3**: 1112.
37. Jiru TM, Abate D, Kiggundu N, Pohl C, Groenewald M. Oleaginous yeasts from Ethiopia. *AMB Expr* 2016; **6**: 78.



38. Wright JonathanD, Ratledge C. Isolation of two *Rhodotorula rubra* strains showing differences in the degradation of aromatic compounds. *Appl Microbiol Biotechnol* 1991; **35**.
39. Lillie SH, Pringle JR. Reserve carbohydrate metabolism in *Saccharomyces cerevisiae*: responses to nutrient limitation. *J Bacteriol* 1980; **143**: 1384–1394.
40. Christ JJ, Willbold S, Blank LM. Methods for the analysis of polyphosphate in the life sciences. *Anal Chem* 2020; **92**: 4167–4176.
41. Diezmann S, Dietrich FS. *Saccharomyces cerevisiae*: Population divergence and resistance to oxidative stress in clinical, domesticated and wild isolates. *PLoS ONE* 2009; **4**: e5317.
42. Liu G-Q, Jin X-C. Screening and optimization of microbial lipid production by *Thamnidium* sp., a novel oleaginous fungus isolated from forest soil. *J Biotechnol* 2008; **136**: S434.
43. Chen J, Ishii T, Shimura S, Kirimura K, Usami S. Lipase production by *Trichosporon fermentans* WU-C12, a newly isolated yeast. *J Ferment Bioeng* 1992; **73**: 412–414.
44. André A, Chatzifragkou A, Diamantopoulou P, Sarris D, Philippoussis A, Galiotou-Panayotou M, et al. Biotechnological conversions of bio-diesel-derived crude glycerol by *Yarrowia lipolytica* strains. *Eng Life Sci* 2009; **9**: 468–478.
45. Yalçın HT, Ergin-Tepebaşı G, Uyar E. Isolation and molecular characterization of biosurfactant producing yeasts from the soil samples contaminated with petroleum derivatives. *J Basic Microbiol* 2018; **58**: 782–792.
46. Clifton-García B, González-Reynoso O, Robledo-Ortiz JR, Villafaña-Rojas J, González-García Y. Forest soil bacteria able to produce homo and copolymers of polyhydroxyalkanoates from several pure and waste carbon sources. *Lett Appl Microbiol* 2020; **70**: 300–309.
47. Zhou X-K, Li Q-Q, Mo M-H, Zhang Y-G, Dong L-M, Xiao M, et al. *Sphingobacterium tabacisoli* sp. nov., isolated from a tobacco field soil sample. *Int J Syst Evol Microbiol* 2017; **67**: 4808–4813.
48. Alvarez HM, Pucci OH, Steinbüchel A. Lipid storage compounds in marine bacteria. *Appl Microbiol Biotechnol* 1997; **47**: 132–139.

49. Scott CC, Finnerty WR. Characterization of intracytoplasmic hydrocarbon inclusions from the hydrocarbon-oxidizing *Acinetobacter* species HO1-N. *J Bacteriol* 1976; **127**: 481.
50. Ishige T, Tani A, Takabe K, Kawasaki K, Sakai Y, Kato N. Wax ester production from n-alkanes by *Acinetobacter* sp. strain M-1: Ultrastructure of cellular inclusions and role of acyl coenzyme A reductase. *Appl Environ Microbiol* 2002; **68**: 1192–1195.
51. Deinema MH, van Loosdrecht M, Scholten A. Some physiological characteristics of *Acinetobacter* spp. accumulating large amounts of phosphate. *Water Sci Technol* 1985; **17**: 119–125.
52. Elbahloul Y, Krehenbrink M, Reichelt R, Steinbuchel A. Physiological conditions conducive to high cyanophycin content in biomass of *Acinetobacter calcoaceticus* strain ADP1. *Appl Environ Microbiol* 2005; **71**: 858–866.
53. Kim D, Baik KS, Kim MS, Park SC, Kim SS, Rhee MS, et al. *Acinetobacter soli* sp. nov., isolated from forest soil. *J Microbiol* 2008; **46**: 396–401.
54. Lee SH, Oh DH, Ahn WS, Lee Y, Choi J, Lee SY. Production of poly(3-hydroxybutyrate-co-3-hydroxyhexanoate) by high-cell-density cultivation of *Aeromonas hydrophila*. *Biotechnol Bioeng* 2000; **67**: 5.
55. Carter JP, Hsiao YH, Spiro S, Richardson DJ. Soil and sediment bacteria capable of aerobic nitrate respiration. *Appl Environ Microbiol* 1995; **61**: 2852–2858.
56. Yu PH, Chua H, Huang A-L, Ho K-P. Conversion of industrial food wastes by *Alcaligenes latus* into polyhydroxyalkanoates. In: Davison BH, Finkelstein M (eds). *Twentieth Symposium on Biotechnology for Fuels and Chemicals*. 1999. Humana Press, Totowa, NJ, pp 445–454.
57. Mendes R, Garbeva P, Raaijmakers JM. The rhizosphere microbiome: significance of plant beneficial, plant pathogenic, and human pathogenic microorganisms. *FEMS Microbiol Rev* 2013; **37**: 634–663.

58. Kalscheuer R, Stöveken T, Malkus U, Reichelt R, Golyshin PN, Sabirova JS, et al. Analysis of storage lipid accumulation in *Alcanivorax borkumensis*: Evidence for alternative triacylglycerol biosynthesis routes in bacteria. *J Bacteriol* 2007; **189**: 918–928.
59. SadrAzodi SM, Shavandi M, Amoozegar MA, Mehrnia MR. Biodegradation of long chain alkanes in halophilic conditions by *Alcanivorax* sp. strain Est-02 isolated from saline soil. *3 Biotech* 2019; **9**: 141.
60. Kumar V, AlMomin S, Al-Aqeel H, Al-Salameen F, Nair S, Shajan A. Metagenomic analysis of rhizosphere microflora of oil-contaminated soil planted with barley and alfalfa. *PLoS ONE* 2018; **13**: e0202127.
61. Watzer B, Forchhammer K. Cyanophycin: A nitrogen-rich reserve polymer. In: Tiwari A (ed). *Cyanobacteria*. 2018. InTech.
62. Kaewbai-ngam A, Incharoensakdi A, Monshupanee T. Increased accumulation of polyhydroxybutyrate in divergent cyanobacteria under nutrient-deprived photoautotrophy: An efficient conversion of solar energy and carbon dioxide to polyhydroxybutyrate by *Calothrix scytonemicola* TISTR 8095. *Bioresour Technol* 2016; **212**: 342–347.
63. Alghanmi HA, Jawad HM. Effect of environmental factors on cyanobacteria richness in some agricultural soils. *Geomicrobiol J* 2019; **36**: 75–84.
64. Xiao Z, Zhang Y, Xi L, Huo F, Zhao J, Li J. Thermophilic production of polyhydroxyalkanoates by a novel *Aneurinibacillus* strain isolated from Gudao oilfield, China. *J Basic Microbiol* 2015; **55**: 1125–1133.
65. Murai A, Tsujimoto Y, Matsui H, Watanabe K. An *Aneurinibacillus* sp. strain AM-1 produces a proline-specific aminopeptidase useful for collagen degradation. *J Appl Microbiol* 2004; **96**: 810–818.
66. Allen MM, Hutchison F. Nitrogen limitation and recovery in the cyanobacterium *Aphanocapsa* 6308. *Arch Microbiol* 1980; **128**: 1–7.

67. Chapman SJ, Gray TRG. Endogenous metabolism and macromolecular composition of *Arthrobacter globiformis*. *Soil Biol Biochem* 1981; **13**: 11–18.
68. Kumar V, Thakur V, Ambika, Kumar S, Singh D. Bioplastic reservoir of diverse bacterial communities revealed along altitude gradient of Pangi-Chamba trans-Himalayan region. *FEMS Microbiol Lett* 2018; **365**.
69. Hauschild P, Röttig A, Madkour MH, Al-Ansari AM, Almakishah NH, Steinbüchel A. Lipid accumulation in prokaryotic microorganisms from arid habitats. *Appl Microbiol Biotechnol* 2017; **101**: 2203–2216.
70. Hagedorn C, Holt JG. A nutritional and taxonomic survey of *Arthrobacter* soil isolates. *Can J Microbiol* 1975; **21**: 353–361.
71. Campbell J, Stevens SE, Balkwill DL. Accumulation of poly-3-hydroxybutyrate in *Spirulina platensis*. *J Bacteriol* 1982; **149**: 361–363.
72. Aikawa S, Izumi Y, Matsuda F, Hasunuma T, Chang J-S, Kondo A. Synergistic enhancement of glycogen production in *Arthrospira platensis* by optimization of light intensity and nitrate supply. *Bioresour Technol* 2012; **108**: 211–215.
73. Samantaray S, Nayak JK, Mallick N. Wastewater utilization for poly- $\beta$ -hydroxybutyrate production by the cyanobacterium *Aulosira fertilissima* in a recirculatory aquaculture system. *Appl Environ Microbiol* 2011; **77**: 8735–8743.
74. Pandey KD, Shukla PN, Giri DD, Kashyap AK. Cyanobacteria in alkaline soil and the effect of cyanobacteria inoculation with pyrite amendments on their reclamation. *Biol Fertil Soils* 2005; **41**: 451–457.
75. Amini M, Sobhani S, Younesi H, Abyar H, Salamatinia B, Mohammadi M. Evaluating the feasibility of poly (3-hydroxybutyrate-co-3-hydroxyvalerate) co-biopolymer production from rice wastewater by *Azohydromonas lata*. *Appl Food Biotechnol* 2020; **7**.
76. Nguyen TM, Kim J. *Azohydromonas riparia* sp. nov. and *Azohydromonas ureilytica* sp. nov. isolated from a riverside soil in South Korea. *J Microbiol* 2017; **55**: 330–336.

77. Tal S, Okon Y. Production of the reserve material poly- $\beta$ -hydroxybutyrate and its function in *Azospirillum brasilense* Cd. *Can J Microbiol* 1985; **31**: 608–613.
78. Michiels K, Vanderleyden J, Van Gool A. *Azospirillum* — plant root associations: A review. *Biol Fertil Soils* 1989; **8**: 356–368.
79. Itzigsohn R, Yarden O, Okon Y. Polyhydroxyalkanoate analysis in *Azospirillum brasilense*. *Can J Microbiol* 1995; **41**: 73–76.
80. de Ville RR, Tchan YT. Quantitative study of the *Azotobacter* population of soil by the immunofluorescence method. *Ann Inst Pasteur (Paris)* 1970; **119**: 492–7.
81. Salgaonkar BB, Mani K, Braganca JM. Characterization of polyhydroxyalkanoates accumulated by a moderately halophilic salt pan isolate *Bacillus megaterium* strain H16. *J Appl Microbiol* 2013; **114**: 1347–1356.
82. Röttig A, Hauschild P, Madkour MH, Al-Ansari AM, Almakishah NH, Steinbüchel A. Analysis and optimization of triacylglycerol synthesis in novel oleaginous *Rhodococcus* and *Streptomyces* strains isolated from desert soil. *J Biotechnol* 2016; **225**: 48–56.
83. Anand A, Aoyagi H. A High throughput isolation method for phosphate-accumulating organisms. *Sci Rep* 2019; **9**: 18083.
84. Teixeira LCRS, Peixoto RS, Cury JC, Sul WJ, Pellizari VH, Tiedje J, et al. Bacterial diversity in rhizosphere soil from Antarctic vascular plants of Admiralty Bay, maritime Antarctica. *ISME J* 2010; **4**: 989–1001.
85. Inglis TJJ, Sagripanti J-L. Environmental factors that affect the survival and persistence of *Burkholderia pseudomallei*. *Appl Environ Microbiol* 2006; **72**: 6865–6875.
86. Kandasamy S, Liu EYR, Patterson G, Saldias S, Ali S, Lazarovits G. Introducing key microbes from high productive soil transforms native soil microbial community of low productive soil. *MicrobiologyOpen* 2019; **8**.
87. Prosperi C, Boluda L, Luna C, Fernandez-Valiente E. Environmental factors affecting in vitro nitrogenase activity of cyanobacteria isolated from rice-fields. *J Appl Phycol* 1992; **4**: 197–204.

88. Qi Q, Rehm BHA. Polyhydroxybutyrate biosynthesis in *Caulobacter crescentus*: molecular characterization of the polyhydroxybutyrate synthase. *Microbiology* 2001; **147**: 3353–3358.
89. Talia P, Sede SM, Campos E, Rorig M, Principi D, Tosto D, et al. Biodiversity characterization of cellulolytic bacteria present on native Chaco soil by comparison of ribosomal RNA genes. *Res Microbiol* 2012; **163**: 221–232.
90. Ibrahim MHA, Willems A, Steinbüchel A. Isolation and characterization of new poly(3HB)-accumulating star-shaped cell-aggregates-forming thermophilic bacteria. *J Appl Microbiol* 2010; 1579–1590.
91. Gommeaux M, Barakat M, Montagnac G, Christen R, Guyot F, Heulin T. Mineral and bacterial diversities of desert sand grains from south-east Morocco. *Geomicrobiol J* 2010; **27**: 76–92.
92. Silva CSP, Genuário DB, Vaz MGMV, Fiore MF. Phylogeny of culturable cyanobacteria from Brazilian mangroves. *Syst Appl Microbiol* 2014; **37**: 100–112.
93. Hassan EA, Abd-Alla MH, Zohri AA, Ragaey MM, Ali SM. Production of butanol and polyhydroxyalkanoate from industrial waste by *Clostridium beijerinckii* ASU10. *Int J Energy Res* 2019; **43**: 3640–3652.
94. Ross DJ. A note on the occurrence of non-symbiotic nitrogen-fixing bacteria in some introduced-pasture soils. *New Zeal J Agr Res* 1960; **3**: 245–249.
95. de Boer W, Leveau JHJ, Kowalchuk GA, Gunnewiek PJAK, Abeln ECA, Figge MJ, et al. *Collimonas fungivorans* gen. nov., sp. nov., a chitinolytic soil bacterium with the ability to grow on living fungal hyphae. *Int J Syst Evol Microbiol* 2004; **54**: 857–864.
96. Seibold G, Dempf S, Schreiner J, Eikmanns BJ. Glycogen formation in *Corynebacterium glutamicum* and role of ADP-glucose pyrophosphorylase. *Microbiology* 2007; **153**: 1275–1285.
97. Pallerla SR, Knebel S, Polen T, Klauth P, Hollender J, Wendisch VF, et al. Formation of volutin granules in *Corynebacterium glutamicum*. *FEMS Microbiol Lett* 2005; **243**: 133–140.
98. Smit E, Leeflang P, Gommans S, van den Broek J, van Mil S, Wernars K. Diversity and seasonal fluctuations of the dominant members of the bacterial soil community in a wheat field as

- determined by cultivation and molecular methods. *Appl Environ Microbiol* 2001; **67**: 2284–2291.
99. Koller M, Gasser I, Schmid F, Berg G. Linking ecology with economy: Insights into polyhydroxyalkanoate-producing microorganisms. *Eng Life Sci* 2011; **11**: 222–237.
  100. Makkar NS, Casida LE. *Cupriavidus necator* gen. nov., sp. nov.; a nonobligate bacterial predator of bacteria in soil. *Int J Syst Bacteriol* 1987; **37**: 323–326.
  101. Li H, Sherman D, Bao S, Sherman L. Pattern of cyanophycin accumulation in nitrogen-fixing and non-nitrogen-fixing cyanobacteria. *Arch Microbiol* 2001; **176**: 9–18.
  102. Caton IR, Schneegurt MA. Culture-independent analysis of the soil bacterial assemblage at the Great Salt Plains of Oklahoma. *J Basic Microbiol* 2012; **52**: 16–26.
  103. Alvarez HM. Relationship between  $\beta$ -oxidation pathway and the hydrocarbon-degrading profile in actinomycetes bacteria. *Int Biodeterior Biodegradation* 2003; **52**: 35–42.
  104. Yamamura H, Lisdiyanti P, Ridwan R, Ratnakomala S, Sarawati R, Lestari Y, et al. *Dietzia timorensis* sp. nov., isolated from soil. *Int J Syst Evol Microbiol* 2010; **60**: 451–454.
  105. Mostafa YS, Alrumman SA, Otaif KA, Alamri SA, Mostafa MS, Sahlabji T. Production and characterization of bioplastic by polyhydroxybutyrate accumulating *Erythrobacter aquimaris* isolated from mangrove rhizosphere. *Molecules* 2020; **25**: 179.
  106. Subhash Y, Tushar L, Sasikala Ch, Ramana ChV. *Erythrobacter odishensis* sp. nov. and *Pontibacter odishensis* sp. nov. isolated from dry soil of a solar saltern. *Int J Syst Evol Microbiol* 2013; **63**: 4524–4532.
  107. Kumar D, Kastanek P, Adhikary SP. Diversity of cyanobacteria in biological crusts on arid soils in the rastery region of India and their molecular phylogeny. *Curr Sci* 2016; **110**: 1999.
  108. Eberly JO, Ringelberg DB, Indest KJ. Physiological characterization of lipid accumulation and in vivo ester formation in *Gordonia* sp. KTR9. *J Ind Microbiol Biotechnol* 2013; **40**: 201–208.
  109. Arenskotter M, Broker D, Steinbuchel A. Biology of the metabolically diverse genus *Gordonia*. *Appl Environ Microbiol* 2004; **70**: 10.

110. Tan D, Xue Y-S, Aibaidula G, Chen G-Q. Unsterile and continuous production of polyhydroxybutyrate by *Halomonas* TD01. *Bioresour Technol* 2011; **102**: 8130–8136.
111. Ren S, Li X, Yin X, Luo C, Liu F. Characteristics of intracellular polyphosphate granules and phosphorus-absorption of a marine polyphosphate-accumulating bacterium, *Halomonas* sp. YSR-3. *J Ocean Limnol* 2020; **38**: 195–203.
112. Quillaguamán J, Hatti-Kaul R, Mattiasson B, Alvarez MT, Delgado O. *Halomonas boliviensis* sp. nov., an alkalitolerant, moderate halophile isolated from soil around a Bolivian hypersaline lake. *Int J Syst Evol Microbiol* 2004; **54**: 721–725.
113. Yamaguchi T, Narsico J, Kobayashi T, Inoue A, Ojima T. Production of poly(3-hydroxybutyrate) by a novel alginolytic bacterium *Hydrogenophaga* sp. strain UMI-18 using alginate as a sole carbon source. *J Biosci Bioeng* 2019; **128**: 203–208.
114. Breugelmans P, D’Huys P-J, De Mot R, Springael D. Characterization of novel linuron-mineralizing bacterial consortia enriched from long-term linuron-treated agricultural soils: Characterization of linuron-mineralizing bacterial consortia. *FEMS Microbiol Ecol* 2007; **62**: 374–385.
115. Goh YS, Tan IKP. Polyhydroxyalkanoate production by antarctic soil bacteria isolated from Casey Station and Signy Island. *Microbiol Res* 2012; **167**: 211–219.
116. Zain N-AA, Ng L-M, Foong CP, Tai YT, Nanthini J, Sudesh K. Complete genome sequence of a novel polyhydroxyalkanoate (PHA) producer, *Jeongeupia* sp. USM3 (JCM 19920) and characterization of its PHA synthases. *Curr Microbiol* 2020; **77**: 500–508.
117. Goh YJ, Klaenhammer TR. A functional glycogen biosynthesis pathway in *Lactobacillus acidophilus* : expression and analysis of the *glg* operon: Glycogen metabolism in *L. acidophilus*. *Mol Microbiol* 2013; **89**: 1187–1200.
118. Chen Y-S, Yanagida F, Shinohara T. Isolation and identification of lactic acid bacteria from soil using an enrichment procedure. *Lett Appl Microbiol* 2005; **40**: 195–200.



119. Bhatnagar A, Makandar MB, Garg MK, Bhatnagar M. Community structure and diversity of cyanobacteria and green algae in the soils of Thar Desert (India). *J Arid Environ* 2008; **72**: 73–83.
120. Hernández-Mariné MC, Fernández M, Merino V. *Mastigocladopsis repens* Nostochopsaceae), a new Cyanophyte from Spanish soils. *Cryptogamie, Algologie* 1992; **13**: 113–120.
121. Carere CR, McDonald B, Peach HA, Greening C, Gapes DJ, Collet C, et al. Hydrogen oxidation influences glycogen accumulation in a verrucomicrobial methanotroph. *Front Microbiol* 2019; **10**: 1873.
122. Carere CR, Hards K, Houghton KM, Power JF, McDonald B, Collet C, et al. Mixotrophy drives niche expansion of verrucomicrobial methanotrophs. *ISME J* 2017; **11**: 2599–2610.
123. Bourque D, Ouellette B, André G, Groleau D. Production of poly- $\beta$ -hydroxybutyrate from methanol: characterization of a new isolate of *Methylobacterium extorquens*. *Appl Microbiol Biotechnol* 1992; **37**.
124. Pieja AJ, Rostkowski KH, Criddle CS. Distribution and selection of poly-3-hydroxybutyrate production capacity in methanotrophic Proteobacteria. *Microb Ecol* 2011; **62**: 564–573.
125. van Bodegom P, Stams F, Mollema L, Boeke S, Leffelaar P. Methane oxidation and the competition for oxygen in the rice rhizosphere. *Appl Environ Microbiol* 2001; **67**: 3586–3597.
126. Takeda K, Tonouchi A, Takada M, Suko T, Suzuki S, Kimura Y, et al. Characterization of cultivable methanotrophs from paddy soils and rice roots. *Soil Sci Plant Nutr* 2008; **54**: 876–885.
127. Moezelaar R, Bijvank SM, Stal LJ. Fermentation and sulfur reduction in the mat-building cyanobacterium *Microcoleus chthonoplastes*. *Appl Environ Microbiol* 1996; **62**: 1752–1758.
128. Gerasimenko LM, Mityushina LL, Namsaraev BB. *Microcoleus* mats from alkaliphilic and halophilic communities. *Microbiology* 2003; **72**: 71–79.

129. Rajeev L, da Rocha UN, Klitgord N, Luning EG, Fortney J, Axen SD, et al. Dynamic cyanobacterial response to hydration and dehydration in a desert biological soil crust. *ISME J* 2013; **7**: 2178–2191.
130. Starkenburg SR, Reitenga KG, Freitas T, Johnson S, Chain PSG, Garcia-Pichel F, et al. Genome of the cyanobacterium *Microcoleus vaginatus* FGP-2, a photosynthetic ecosystem engineer of arid land soil biocrusts worldwide. *J Bacteriol* 2011; **193**: 4569–4570.
131. Nakamura K, Hiraishi A, Yoshimi Y, Kawaharasaki M, Masuda K, Kamagata Y. *Microlunatus phosphovorus* gen. nov., sp. nov., a new Gram-positive polyphosphate-accumulating bacterium isolated from activated sludge. *Int J Syst Bacteriol* 1995; **45**: 17–22.
132. Lee J-J, Kim MK. *Microlunatus terrae* sp. nov., a bacterium isolated from soil. *J Microbiol* 2012; **50**: 547–552.
133. Rao NN, Gómez-García MR, Kornberg A. Inorganic polyphosphate: Essential for growth and survival. *Annu Rev Biochem* 2009; **78**: 605–647.
134. Barksdale L, Kim KS. Mycobacterium. *Bacteriol Rev* 1977; **41**: 217–372.
135. Falkinham JO. Nontuberculous mycobacteria in the environment. *Clin Chest Med* 2002; **23**: 529–551.
136. Voelz H, Voelz U, Ortigoza RO. The “polyphosphate overplus” phenomenon in *Myxococcus xanthus* and its influence on the architecture of the cell. *Archiv für Mikrobiologie* 1966; **53**: 371–388.
137. Dawid W. Biology and global distribution of myxobacteria in soils. *FEMS Microbiol Rev* 2000; **25**.
138. Raymond RL, Davis JB. n-Alkane utilization and lipid formation by a *Nocardia*. *Appl Microbiol* 1960; **8**: 329–334.
139. Wang L, Zhang Y, Lu Z, Shi Y, Liu Z, Maldonado L, et al. *Nocardia beijingensis* sp. nov., a novel isolate from soil. *Int J Syst Evol Microbiol* 2001; **51**: 1783–1788.

140. Sharma L, Mallick N. Accumulation of poly- $\beta$ -hydroxybutyrate in *Nostoc muscorum*: regulation by pH, light–dark cycles, N and P status and carbon sources. *Bioresour Technol* 2005; **96**: 1304–1310.
141. Dietrich K, Dumont M-J, Orsat V, Del Rio LF. Consumption of sugars and inhibitors of softwood hemicellulose hydrolysates as carbon sources for polyhydroxybutyrate (PHB) production with *Paraburkholderia sacchari* IPT 101. *Cellulose* 2019; **26**: 7939–7952.
142. Gao Z, Yuan Y, Xu L, Liu R, Chen M, Zhang C. *Paraburkholderia caffeinilytica* sp. nov., isolated from the soil of a tea plantation. *Int J Syst Evol Microbiol* 2016; **66**: 4185–4190.
143. Siller H, Rainey FA, Stackebrandt E, Winter J. Isolation and characterization of a new Gram-negative, acetone-degrading, nitrate-reducing bacterium from soil, *Paracoccus solventivorans* sp. nov. *Int J Syst Bacteriol* 1996; **46**: 1125–1130.
144. Davey MC, Clarke KJ. The spatial distribution of microalgae on Antarctic fellfield soils. *Antarctic Sci* 1991; **3**: 257–263.
145. Lou J, Dawson KA, Strobel HJ. Glycogen formation by the ruminal bacterium *Prevotella ruminicola*. *Appl Environ Microbiol* 1997; **63**: 1483–1488.
146. Ueki A, Akasaka H, Satoh A, Suzuki D, Ueki K. *Prevotella paludivivens* sp. nov., a novel strictly anaerobic, Gram-negative, hemicellulose-decomposing bacterium isolated from plant residue and rice roots in irrigated rice-field soil. *Int J Syst Evol Microbiol* 2007; **57**: 1803–1809.
147. Huijberts GN, Eggink G, de Waard P, Huisman GW, Witholt B. *Pseudomonas putida* KT2442 cultivated on glucose accumulates poly(3-hydroxyalkanoates) consisting of saturated and unsaturated monomers. *Appl Environ Microbiol* 1992; **58**: 536–544.
148. Horie S, Yanagida Y, Saheki K, Hiraishi A, Cho K. Occurrence of *Rahnella aquatilis*, psychrotrophic coliforms, in mountain soils. *J Food Hyg Soc Jpn* 1985; **26**: 573-578\_1.
149. Heinrich D, Madkour MH, Al-Ghamdi MA, Shabbaj II, Steinbüchel A. Large scale extraction of poly(3-hydroxybutyrate) from *Ralstonia eutropha* H16 using sodium hypochlorite. *AMB Express* 2012; **2**: 59.

150. Genin S, Denny TP. Pathogenomics of the *Ralstonia solanacearum* species complex. *Annu Rev Phytopathol* 2012; **50**: 67–89.
151. Ben Rebah F, Prévost D, Tyagi RD, Belbahri L. Poly- $\beta$ -hydroxybutyrate production by fast-growing rhizobia cultivated in sludge and in industrial wastewater. *Appl Biochem Biotechnol* 2009; **158**: 155–163.
152. Young JPW, Demetriou L, Apte RG. Rhizobium population genetics: Enzyme polymorphism in *Rhizobium leguminosarum* from plants and soil in a pea crop. *Appl Environ Microbiol* 1987; **53**: 397–402.
153. Brandl H, Gross Richard A, Lenz Robert W, Lloyd R, Fuller RC. The accumulation of poly(3-hydroxyalkanoates) in *Rhodobacter sphaeroides*. *Arch Microbiol* 1991; **155**.
154. Chalam AV, Sasikala Ch, Ramana ChV, Raghuvver Rao P. Effect of pesticides on hydrogen metabolism of *Rhodobacter sphaeroides* and *Rhodospseudomonas palustris*. *FEMS Microbiol Ecol* 1996; **19**: 1–4.
155. Cortes MALRM, de Carvalho CCCR. Effect of carbon sources on lipid accumulation in *Rhodococcus* cells. *Biochem Eng J* 2015; **94**: 100–105.
156. Hernández MA, Alvarez HM. Glycogen formation by *Rhodococcus* species and the effect of inhibition of lipid biosynthesis on glycogen accumulation in *Rhodococcus opacus* PD630. *FEMS Microbiol Lett* 2010; **312**: 93–99.
157. Wältermann M, Luftmann H, Baumeister D, Kalscheuer R, Steinbüchel A. *Rhodococcus opacus* strain PD630 as a new source of high-value single-cell oil? Isolation and characterization of triacylglycerols and other storage lipids. *Microbiology* 2000; **146**: 1143–1149.
158. Vincenzini M, Marchini A, Ena A, De Philippis R. H<sub>2</sub> and poly- $\beta$ -hydroxybutyrate, two alternative chemicals from purple non sulfur bacteria. *Biotechnol Lett* 1997; **19**: 759–762.
159. Brandl H, Knee EJ Jr, Fuller RC, Gross RA, Lenz RW. Ability of the phototrophic bacterium *Rhodospirillum rubrum* to produce various poly ( $\beta$ -hydroxyalkanoates): potential sources for biodegradable polyesters. *Int J Biol Macromol* 1989; **11**: 49–55.

160. Lakshmi KVNS, Sasikala Ch, Ramaprasad EVV, Ramana ChV. *Rhodospirillum oryzae* sp. nov., a phototrophic bacterium isolated from rhizosphere soil of paddy. *Int J Syst Evol Microbiol* 2013; **63**: 3050–3055.
161. Carlozzi P, Di Lorenzo T, Ghanotakis DF, Touloupakis E. Effects of pH, temperature and salinity on P3HB synthesis culturing the marine *Rhodovulum sulfidophilum* DSM-1374. *Appl Microbiol Biotechnol* 2020; **104**: 2007–2015.
162. Khatri I, Nupur, Korpole S, Subramanian S, Pinnaka AK. Draft genome sequence of *Rhodovulum* sp. strain PH10, a phototrophic alphaproteobacterium isolated from a soil sample of mangrove of Namkhana, India. *J Bacteriol* 2012; **194**: 6363–6363.
163. Kim J, Kim D-Y, Yang K-H, Kim S, Lee S-S. *Ruegeria lutea* sp. nov., isolated from marine sediment, Masan Bay, South Korea. *Int J Syst Evol Microbiol* 2019; **69**: 2854–2861.
164. Zhang L, Wang K-L, Yin Q, Liang J-Y, Xu Y. *Ruegeria kandeliae* sp. nov., isolated from the rhizosphere soil of a mangrove plant *Kandelia candel*. *Int J Syst Evol Microbiol* 2018; **68**: 2653–2658.
165. Van Thuoc D, My DN, Loan TT, Sudesh K. Utilization of waste fish oil and glycerol as carbon sources for polyhydroxyalkanoate production by *Salinivibrio* sp. M318. *Int J Biol Macromol* 2019; **141**: 885–892.
166. Caton TM, Witte LR, Ngyuen HD, Buchheim JA, Buchheim MA, Schneegurt MA. Halotolerant aerobic heterotrophic bacteria from the Great Salt Plains of Oklahoma. *Microb Ecol* 2004; **48**: 449–462.
167. Williams W, Chilton A, Schneemilch M, Williams S, Neilan B, Driscoll C. Microbial biobanking – cyanobacteria-rich topsoil facilitates mine rehabilitation. *Biogeosciences* 2019; **16**: 2189–2204.
168. Hartmann A, Giraud JJ, Catroux G. Genotypic diversity of *Sinorhizobium* (formerly *Rhizobium*) meliloti strains isolated directly from a soil and from nodules of alfalfa (*Medicago sativa*) grown in the same soil. *FEMS Microbiol Ecol* 1998; **25**: 107–116.

169. Tamboli DP, Kurade MB, Waghmode TR, Joshi SM, Govindwar SP. Exploring the ability of *Sphingobacterium* sp. ATM to degrade textile dye Direct Blue GLL, mixture of dyes and textile effluent and production of polyhydroxyhexadecanoic acid using waste biomass generated after dye degradation. *J Hazard Mater* 2010; **182**: 169–176.
170. Shrivastav A, Mishra SK, Mishra S. Polyhydroxyalkanoate (PHA) synthesis by *Spirulina subsalsa* from Gujarat coast of India. *Int J Biol Macromol* 2010; **46**: 255–260.
171. de Philippis R, Sili C, Vincenzini M. Glycogen and poly- $\beta$ -hydroxybutyrate synthesis in *Spirulina maxima*. *J Gen Microbiol* 1992; **138**: 1623–1628.
172. Williams WJ, Eldridge DJ. Deposition of sand over a cyanobacterial soil crust increases nitrogen bioavailability in a semi-arid woodland. *Appl Soil Ecol* 2011; **49**: 26–31.
173. Olukoshi ER, Packter NM. Importance of stored triacylglycerols in *Streptomyces*: possible carbon source for antibiotics. *Microbiology* 1994; **140**: 931–943.
174. Duangmal K, Ward AC, Goodfellow M. Selective isolation of members of the *Streptomyces violaceoruber* clade from soil. *FEMS Microbiol Lett* 2005; **245**: 321–327.
175. Nishioka M, Nakai K, Miyake M, Asada Y, Taya M. Production of poly- $\beta$ -hydroxybutyrate by thermophilic cyanobacterium, *Synechococcus* sp. MA19, under phosphate-limited conditions. *Biotechnol Lett* 2001; **23**: 1095–1099.
176. Aikawa S, Nishida A, Ho S-H, Chang J-S, Hasunuma T, Kondo A. Glycogen production for biofuels by the euryhaline cyanobacteria *Synechococcus* sp. strain PCC 7002 from an oceanic environment. *Biotechnol Biofuels* 2014; **7**: 88.
177. Zhang W, Feng Y. Characterization of nitrogen-fixing moderate halophilic cyanobacteria isolated from saline soils of Songnen Plain in China. *Prog Nat Sci* 2008; **18**: 769–773.
178. Klotz A, Georg J, Bučinská L, Watanabe S, Reimann V, Januszewski W, et al. Awakening of a dormant cyanobacterium from nitrogen chlorosis reveals a genetically determined program. *Curr Biol* 2016; **26**: 2862–2872.

179. Mackerras AH, de Chazal NM, Smith GD. Transient accumulations of cyanophycin in *Anabaena cylindrica* and *Synechocystis* 6308. *J Gen Microbiol* 1990; **136**: 2057–2065.
180. Monshupanee T, Incharoensakdi A. Enhanced accumulation of glycogen, lipids and polyhydroxybutyrate under optimal nutrients and light intensities in the cyanobacterium *Synechocystis* sp. PCC 6803. *J Appl Microbiol* 2014; **116**: 830–838.
181. Buck DP, Smith GD. Evidence for a Na<sup>+</sup>/H<sup>+</sup> electrogenic antiporter in an alkaliphilic cyanobacterium *Synechocystis*. *FEMS Microbiol Lett* 1995; **128**: 315–320.
182. Van-Thuoc D, Huu-Phong T, Minh-Khuong D, Hatti-Kaul R. Poly(3-hydroxybutyrate-co-3-hydroxyvalerate) production by a moderate halophile *Yangia* sp. ND199 using glycerol as a carbon source. *Appl Biochem Biotechnol* 2015; **175**: 3120–3132.

## Supplementary Information 3: Model description

### 1. Theory

A conceptual model of soil C and N compartments and flows was constructed to assess the effects of internal microbial storage on the short-term dynamics of microbial biomass and substrates. The model is based on Schimel and Weintraub [1], with the addition of a C storage compartment. To illustrate the role of storage in microbial dynamics, we focused on short-term responses to a pulse addition of labile organic matter, neglecting extracellular enzyme synthesis and depolymerization of native soil organic matter. The model includes a bio-available substrate compartment (containing C and N) and a microbial biomass compartment encompassing both 'active' biomass (C and N) and storage compounds (C only). A model schematic is shown in Figure 2 in the main text and symbols are defined in Table S3.1.

#### 1.1. Mass balance equations

Denoting the substrate compartment with the subscript  $S$ , active biomass with  $B$ , and storage with  $ST$ , the mass balance equations for C and N in these compartments can be written as:

$$\frac{dC_S}{dt} = T \left( 1 + \frac{C_{ST}}{C_B} \right) - U_S, \quad (1)$$

$$\frac{dN_S}{dt} = \frac{T}{(C:N)_B} - \frac{U_S}{(C:N)_S}, \quad (2)$$

$$\frac{dC_B}{dt} = U_S - S + U_{ST} - R_G - R_O - R_{ST} - T, \quad (3)$$

$$\frac{dN_B}{dt} = \frac{U_S}{(C:N)_S} - \frac{T}{(C:N)_B} - M_{net}, \quad (4)$$

$$\frac{dC_{ST}}{dt} = S - U_{ST} - \frac{C_{ST}}{C_B} T, \quad (5)$$

where  $T$  is the rate of microbial turnover (recycled as substrate);  $U_S$  and  $U_{ST}$  are the rates of substrate uptake and storage remobilization, respectively;  $S$  is the rate of synthesis of storage compounds;  $R_G$ ,  $R_O$ , and  $R_{ST}$  are the respiration rates associated with growth, overflow, and storage remobilization, respectively;  $M_{net}$  is the net N mineralization rate. In Eq. (1), the term  $1 + \frac{C_{ST}}{C_B}$  accounts for the fact that storage compounds are recycled at the same rate as microbial turnover.

Inorganic N sources are not modelled explicitly, but a maximum net N immobilization rate ( $I_N$ ) is imposed to account for limited availability of inorganic N. This maximum rate is attained when the N demand for growth is high and the organic substrate is N-poor. The C and N flow rates in the mass balance equations (1)-(5) are described in Section S1.2, and their stoichiometric relations in Section S1.3. Specific choices for the definitions of the storage synthesis and remobilization rates are presented in Section 1.4.



**Table S3.1:** List of symbols and their units (see also Figure S3.1 and main text Figure 2).

| Symbol                                                               | Definition                                                     | Units                                       |
|----------------------------------------------------------------------|----------------------------------------------------------------|---------------------------------------------|
| State variables                                                      |                                                                |                                             |
| $C_B$                                                                | Microbial biomass C (Eq. (3))                                  | mg C g soil <sup>-1</sup>                   |
| $C_S$                                                                | Substrate C (Eq. (1))                                          | mg C g soil <sup>-1</sup>                   |
| $C_{ST}$                                                             | Storage C (Eq. (5))                                            | mg C g soil <sup>-1</sup>                   |
| $(C:N)_S$                                                            | Substrate C:N ratio (both $C_S$ and $N_S$ are state variables) | mg C mg N <sup>-1</sup>                     |
| $N_B$                                                                | Microbial biomass N (Eq. (4))                                  | mg N g soil <sup>-1</sup>                   |
| $N_S$                                                                | Substrate N (Eq. (2))                                          | mg N g soil <sup>-1</sup>                   |
| C and N flow rates (calculated as a function of the state variables) |                                                                |                                             |
| $M_{net}$                                                            | Net N mineralization rate (Eq. (6))                            | mg N g soil <sup>-1</sup> day <sup>-1</sup> |
| $R$                                                                  | Total microbial respiration rate                               | mg C g soil <sup>-1</sup> day <sup>-1</sup> |
| $R_G$                                                                | Respiration rate for growth on substrate C                     | mg C g soil <sup>-1</sup> day <sup>-1</sup> |
| $R_{ST}$                                                             | Respiration rate for growth on storage C                       | mg C g soil <sup>-1</sup> day <sup>-1</sup> |
| $R_O$                                                                | Rate of overflow respiration (Eq. (8))                         | mg C g soil <sup>-1</sup> day <sup>-1</sup> |
| $S$                                                                  | Rate of C storage synthesis                                    | mg C g soil <sup>-1</sup> day <sup>-1</sup> |
| $T$                                                                  | Microbial turnover rate                                        | mg C g soil <sup>-1</sup> day <sup>-1</sup> |
| $U_S$                                                                | Substrate C uptake rate                                        | mg C g soil <sup>-1</sup> day <sup>-1</sup> |
| $U_{ST}$                                                             | Storage C remobilization rate                                  | mg C g soil <sup>-1</sup> day <sup>-1</sup> |
| Model parameters (time invariant)                                    |                                                                |                                             |
| $(C:N)_B$                                                            | C:N ratio of active (non-storage) microbial biomass            | mg C mg N <sup>-1</sup>                     |
| $e$                                                                  | C-use efficiency of the active biomass                         | -                                           |
| $I_N$                                                                | Maximum rate of inorganic N immobilization                     | mg N g soil <sup>-1</sup> day <sup>-1</sup> |
| $k_S$                                                                | Substrate C uptake rate constant                               | day <sup>-1</sup>                           |
| $k_{ST}$                                                             | Storage C remobilization rate constant                         | day <sup>-1</sup>                           |
| $m$                                                                  | Microbial turnover rate constant                               | day <sup>-1</sup>                           |
| $\sigma$                                                             | Fraction of growth allocated to reserve storage                | -                                           |

### 1.2. Definition of C and N flow rates

For illustration, we consider the simple case of a single substrate addition at the beginning of the simulations. An initial concentration of substrate is defined, and its change through time is followed as it is consumed by the microbes in the absence of additional inputs. Assuming that the added substrate is immediately available and does not require enzymatic breakdown, it is reasonable to assume that microbial uptake follows first-order kinetics  $U_S = k_S C_S$ , with a relatively high value of the kinetic constant  $k_S$ . Using nonlinear kinetics involving microbial biomass or an explicit enzyme compartment would not change the results of these short-term simulations, which are dominated by the initial substrate availability. Similarly, first-order kinetics are also assumed for the mortality rates (i.e., microbial turnover is assumed to be independent of microbial nutritional status). The rates of growth respiration associated with C from the substrate ( $C_S$ ) and storage ( $C_{ST}$ ) are modelled as a fraction  $1-e$  of the respective rates of uptake and use, where  $e$  is the C-use efficiency [2–4]. Of the total C uptake rate  $U_S$ , only the fraction remaining available for growth after C allocation to storage incurs growth

respiration costs; i.e.,  $R_G = (1 - e)(U_S - S)$ . Maintenance respiration is neglected as it is expected to be small compared to growth respiration under conditions of substrate-induced growth.

Organic N uptake and microbial N turnover rates are calculated as C flow rates divided by the C:N ratios of the donor compartments. The remaining C and N flow rates ( $R_O$  and  $M_{net}$ ) are defined to fulfil specific stoichiometric constraints, as explained in the following section.

### 1.3. Stoichiometric constraints

We impose the constraint that the active microbial biomass is homeostatic; i.e., its C:N ratio is constant through time, or  $dC_B/dt = (C:N)_B dN_B/dt$ . Note that most models assume that the total microbial biomass C:N ratio is fixed [3], while here we allow for storage C to fluctuate while keeping only the active biomass C:N fixed. This constraint is imposed in two ways depending on whether microbes are C limited or N limited (Figure S3.1). C limitation occurs as long as the microbial N requirements are met by organic or inorganic N—in that case, overflow respiration is zero [1]. In contrast, N limitation occurs when N immobilization is limited by available inorganic N; i.e., N immobilization rate equals a maximum value of  $I_N$  and  $R_O$  removes the extra C that cannot be converted into biomass. While  $R_O$  is interpreted as a respiration term, it could also be regarded as an overflow excretion process that leads to accumulation of extracellular C that is not readily utilized. For the purpose of the present numerical experiments, we consider this extracellular C as ‘lost’, but for long-term simulations it could become a precursor of stabilized soil organic C.

Under C limitation (when  $R_O=0$ ), the constraint of homeostatic microbial biomass leads to the definition of the net N mineralization rate,

$$M_{net} = \frac{U_S}{(C:N)_S} - \frac{U_S - S + U_{ST} - R_G - R_{ST}}{(C:N)_B} = \frac{U_S}{(C:N)_S} - e \frac{U_S + U_{ST} - S}{(C:N)_B}. \quad (6)$$

This equation essentially expresses N mineralization as the difference between supply rate of organic N (i.e.,  $U_S/(C:N)_S$ ) and demand by microbes, calculated as the growth rate under C-limited conditions divided by the microbial C:N ratio (i.e.,  $e(U_S + U_{ST} - S)/(C:N)_B$ ). When the N demand is higher than the supply, net N immobilization ensues. Without storage ( $U_{ST}=0, S=0$ ), Eq. (6) simplifies to

$$M_{net} = \frac{U_S}{(C:N)_S} - \frac{eU_S}{(C:N)_B}, \quad (7)$$

which coincides with the common definition of net N mineralization [3, 5, 6].

Under N limitation, the microbial N demand reaches the maximum rate of inorganic N supply, so that  $M_{net}=I_N$ . This limits the capacity to grow at a fixed C:N, and requires disposing of extra C from the substrate via overflow respiration [1]. Imposing again the constraint of fixed C:N, but now setting  $M_{net}=I_N$ , the rate of overflow respiration is found as,

$$R_O = U_S - S + U_{ST} - R_G - R_{ST} - (C:N)_B \left[ \frac{U_S}{(C:N)_S} + I_N \right] = e(U_S + U_{ST} - S) - (C:N)_B \left[ \frac{U_S}{(C:N)_S} + I_N \right]. \quad (8)$$

Again, without storage dynamics, a previously derived, simpler expression for  $R_O$  is recovered [1, 3],

$$R_O = eU_S - (C:N)_B \left[ \frac{U_S}{(C:N)_S} + I_N \right]. \quad (9)$$

Together, Eq. (6) and (8) ensure that the active biomass maintains its C:N ratio at a fixed value, while C accumulates and is depleted in the storage compartment. This means that the overall C:N of total biomass (active microbial biomass plus storage) does vary through time. Equations (6) and (8) are general and hold for any choice of storage synthesis and remobilization kinetics. In Section 1.4, different alternative storage strategies are presented, which result in specific expressions for the rates of net N mineralization and overflow respiration.

#### 1.4. Dynamics of microbial internal storage

Two modes of internal storage synthesis and remobilization are considered, in addition to a baseline scenario in which storage is not used (Figure S3.1): i) reserve storage, in which storage synthesis equals a fixed fraction of substrate uptake, and storage remobilization depends only on the amount of C in storage, and ii) surplus accumulation, in which storage synthesis increases when microbes are N-limited and storage remobilization is activated when they are C-limited.

##### 1.4.1. Reserve storage

This storage mode has been implemented in models of waste water treatment systems. The rate of storage synthesis is modelled as a fraction  $\sigma$  of the substrate C uptake rate,  $S = \sigma U_S$  [2, 4]. The rate of storage remobilization is assumed to follow first-order kinetics  $U_{ST} = k_{ST} C_{ST}$ , thus neglecting the inhibition effect that high substrate concentration might have on storage remobilization [2, 4]—a reasonable assumption in soils where substrate concentrations are typically low. With this storage mode, allocation to storage is independent of N availability, so that under N-limitation, C overflow becomes necessary to maintain a stable active biomass C:N ratio.

##### 1.4.2. Surplus accumulation

In this storage mode, C storage can be increased under N limitation and decreased under C limitation to compensate stoichiometric imbalances (Figure S3.1). For simplicity, we assume that under N limitation, all excess C is converted to storage and that no storage is used for growth. In contrast, under C limitation, all C required to convert excess N into biomass is drawn from the storage compartment, whereas no C is allocated to new storage. This storage mode represents an idealized case, as microbes likely cannot attain such a degree of complete flexibility in C storage synthesis and remobilization. However, it serves as a counterpoint to the reserve storage mode, where storage dynamics are independent of N availability.

Following these assumptions, the rate of storage synthesis  $S=0$  under C limited conditions, whereas  $S$  is defined to maintain fixed active biomass C:N ratio without C overflow under N limited conditions (i.e.,  $R_O=0$  in Eq. (8)),

$$S = - \left[ \frac{1}{e} \frac{(C:N)_B}{(C:N)_S} - 1 \right] U_S - \frac{(C:N)_B}{e} I_N. \quad (10)$$

Note that the storage remobilization rate  $U_{ST}$  (and associated respiration  $R_{ST}$ ) does not appear in Eq. (10) because we assume that under N limitation, storage C is not used for growth—it would cause a further increase in N demand at a time when N is already scarce.

In contrast, under C limited conditions, the rate of storage C remobilization  $U_{ST}$  is defined to maintain a fixed microbial C:N ratio without N losses (i.e.,  $M_{net}=0$  in Eq. (6)),

$$U_{ST} = \left[ \frac{1}{e} \frac{(C:N)_B}{(C:N)_S} - 1 \right] U_S. \quad (11)$$

Note that the storage synthesis rate  $S$  does not appear in Eq. (11) because we assume that under C limitation, storage C is not synthesized—it would cause a further increase in C demand at a time when C is already limited. Moreover, the rate of storage C remobilization is capped by a maximum rate defined as in the reserve storage mode (i.e.,  $U_{ST} = k_{ST}C_{ST}$ ), to avoid remobilization of more C than is actually contained in the storage compartment. Mathematically, this constraint is defined by imposing that  $U_{ST}$  is the minimum between the value calculated from Eq. (11) and  $k_{ST}C_{ST}$ .

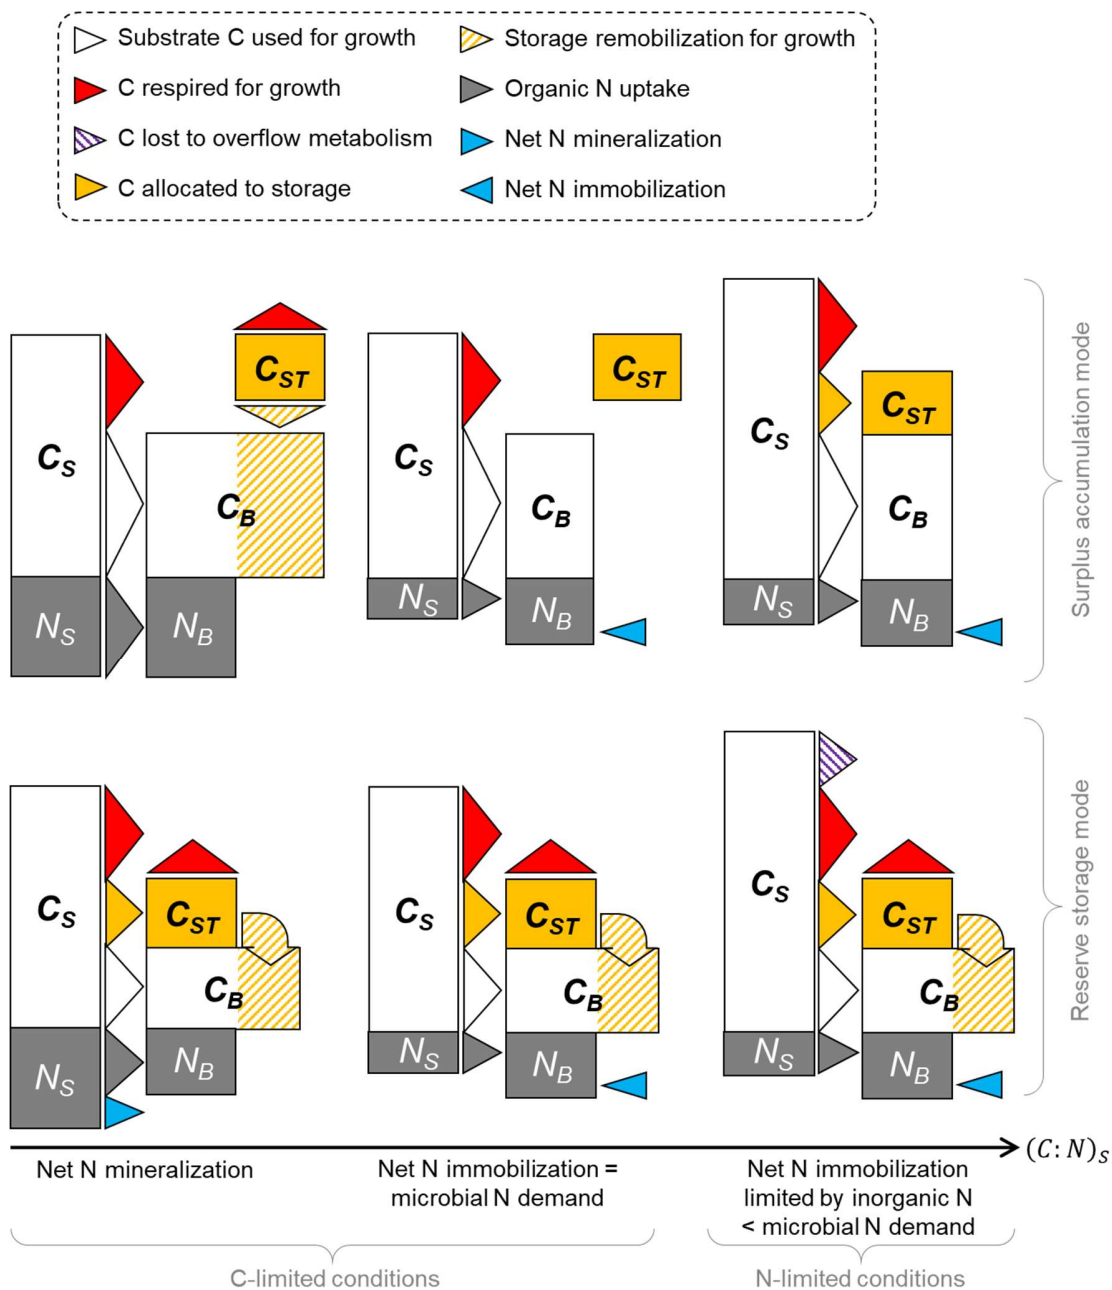

**Figure S3.1:** Schematic of the changes in C and N flows as the substrate C:N ratio is increased (left to right), for two different C storage synthesis and remobilization modes: i) reserve storage, in which storage synthesis is a fixed fraction of microbial growth, independent of N limitation (which results in C overflow under N limitation; bottom row) or ii) surplus accumulation, in which storage synthesis is regulated to compensate stoichiometric imbalances (which results in no C overflow; top row). Color-coded arrows represent C and N flows; rectangles represent substrate and microbial compartments. Note that with the surplus accumulation mode, C storage is only remobilized when N is in excess (i.e., C is limiting) and only synthesized when C is in excess (N is limiting).

## 2. Model parameterization

The goal of the analyses presented here is to explore the effect of contrasting storage modes on substrate use and microbial growth. As such, we do not perform a formal model calibration, but estimate parameter values and initial conditions based on available literature data. The model has only eight microbial parameters, in addition to substrate input rate and C:N ratio, which are varied to simulate different experimental conditions (Table S3.1). To define a set of reasonable microbial parameter values, we consider the dynamics of microbial biomass in the experiment by Chen et al. [7], where microbial biomass increased from approximately 1 to 2 mg C g soil<sup>-1</sup> in a few days after addition of an amount of labile C double the value of microbial C (in the soil labelled there as 'P-rich'). The microbial turnover rate ( $=m$ ) was  $\approx 0.04$  day<sup>-1</sup> and  $(C:N)_B=8.9$  before the amendment. Since we consider additions of labile substrates, we can assume a relatively high C-use efficiency  $e=0.5$ . Based on previous model results [4], it is reasonable to assume that growth on substrate and storage C occurs with equal efficiency and, for the reserve storage mode, with an equal rate constant (i.e.,  $k_S=k_{ST}$ ). Due to the speed of microbial uptake of labile substrates (time scales of hours),  $k_S$  was set equal to 1 day<sup>-1</sup>. The fraction of substrate C allocated to storage in the reserve storage mode is arbitrarily set to 0.2— somewhat lower than values previously reported [8], but likely more representative of soil conditions. The last parameter to be estimated is  $I_N$ , which represents the availability of inorganic N in the soil. We chose a value  $I_N=0.01$  mg N g soil<sup>-1</sup> day<sup>-1</sup>, which corresponds to a sufficient inorganic N supply to convert approximately 1 mg C g soil<sup>-1</sup> of substrate into biomass in 5 days.

We performed two types of numerical experiments: i) simulation of microbial and storage C concentrations and element flows through time following an initial addition of a fixed amount of substrate with  $(C:N)_I=50$  (Figure S3.2 and main text Figure 3A); ii) simulations covering a gradient of initial substrate C:N, for a fixed amount of added substrate C, with microbial biomass and cumulative net N mineralization rates evaluated at the end of each simulation (10 days after substrate addition) to summarize the effect of the three storage modes on microbial C-use efficiency and inorganic N availability (main text Figure 3B and C).

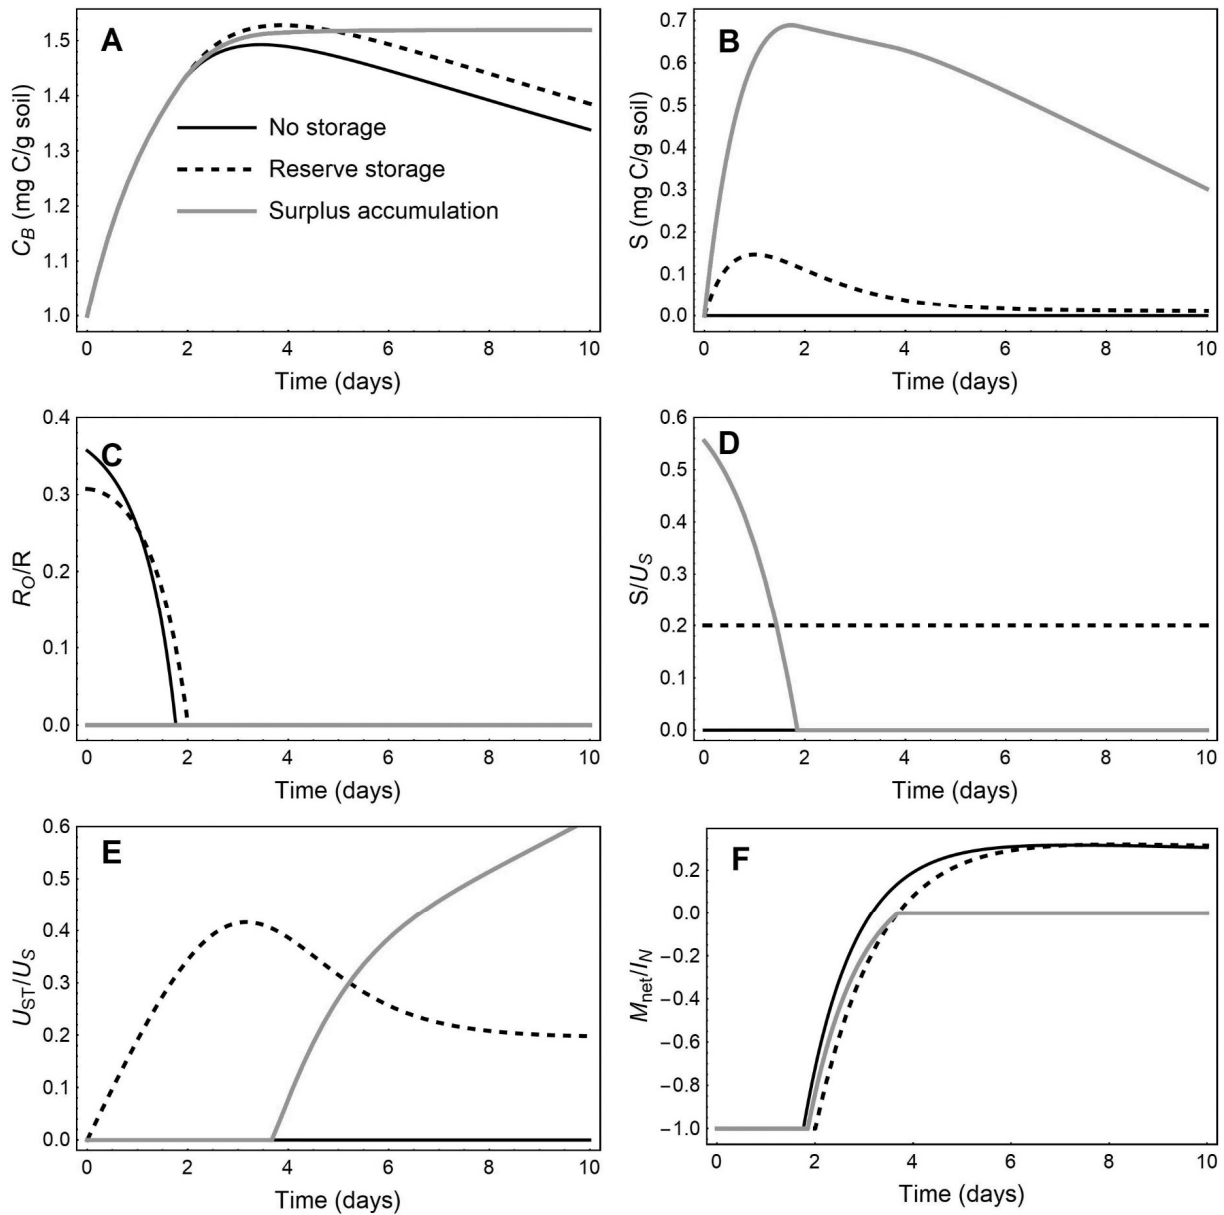

**Figure S3.2:** Temporal dynamics of C and N concentrations and flow rates after substrate addition for two storage modes (compared to a baseline case of no storage use): A) microbial biomass C ( $C_B$ ); B) internal storage C ( $S$ ); C) fraction of total respiration due to overflow ( $R_O/R$ ); D) rate of storage synthesis,  $S$ , normalized by the rate of substrate uptake,  $U_S$ ; E) rate of storage remobilization,  $U_{ST}$ , normalized by  $U_S$ ; F) net N mineralization rate,  $M_{net}$ , normalized by the maximum rate of N immobilization,  $I_N$ . Initial conditions:  $C_B(t=0)=1$  mg C g soil<sup>-1</sup>,  $S(t=0)=0$  mg C g soil<sup>-1</sup>,  $C_S(t=0)=2$  mg C g soil<sup>-1</sup>;  $N_S(t=0)=0.04$  mg N g soil<sup>-1</sup> (i.e.,  $(C:N)_I=50$ ).

### 3. References

1. Schimel JP, Weintraub MN. The implications of exoenzyme activity on microbial carbon and nitrogen limitation in soil: a theoretical model. *Soil Biol Biochem* 2003; **35**: 549–563.
2. Karahan O, Van Loosdrecht MCM, Orhon D. Modeling the utilization of starch by activated sludge for simultaneous substrate storage and microbial growth. *Biotechnol Bioeng* 2006; **94**: 43–53.
3. Manzoni S, Porporato A. Soil carbon and nitrogen mineralization: Theory and models across scales. *Soil Biol Biochem* 2009; **41**: 1355–1379.
4. Ni B-J, Fang F, Rittmann BE, Yu H-Q. Modeling microbial products in activated sludge under feast-famine conditions. *Environ Sci Technol* 2009; **43**: 2489–2497.
5. Ågren GI, Bosatta E. Theoretical ecosystem ecology. Understanding element cycles. 1998. Cambridge University Press, Cambridge, United Kingdom.
6. Manzoni S, Jackson RB, Trofymow JA, Porporato A. The global stoichiometry of litter nitrogen mineralization. *Science* 2008; **321**: 684–686.
7. Chen J, Seven J, Zilla T, Dippold MA, Blagodatskaya E, Kuzyakov Y. Microbial C:N:P stoichiometry and turnover depend on nutrients availability in soil: A C-14, N-15 and P-33 triple labelling study. *Soil Biol Biochem* 2019; **131**: 206–216.
8. Obruca S, Benesova P, Oborna J, Marova I. Application of protease-hydrolyzed whey as a complex nitrogen source to increase poly(3-hydroxybutyrate) production from oils by *Cupriavidus necator*. *Biotechnol Lett* 2014; **36**: 775–781.
